1 **Title:** Long-term Association between NO<sub>2</sub> and Human Mobility: A Two-year  
2 Spatiotemporal Study during the COVID-19 Pandemic in Southeast Asia

3 **Authors:** Zhaoyin Liu<sup>1,2</sup>, Yangyang Li<sup>2</sup>, Andrea Law<sup>2</sup>, Jia Yu Karen Tan<sup>2</sup>, Wee Han  
4 Chua<sup>2</sup>, Yihan Zhu<sup>3</sup>, Chen-Chieh Feng<sup>2</sup>, Wei Luo<sup>2,4</sup> \*

5 <sup>1</sup> School of Public Health, Nanjing Medical University, China, CN

6 <sup>2</sup> Department of Geography, National University of Singapore, Singapore, SG

7 <sup>3</sup> Department of Architecture, National University of Singapore, Singapore, SG

8 <sup>4</sup> Saw Swee Hock School of Public Health, National University of Singapore,  
9 Singapore, SG

10 \*Corresponding author

11 **Keywords:** Spatio-Temporal Analysis, NO<sub>2</sub>, Mobility, Southeast Asia, COVID-19

12

### 13 **Abstract**

14 Since the COVID-19 pandemic, governments have implemented lockdowns and  
15 movement restrictions to contain the disease outbreak. Previous studies have reported  
16 a significant positive correlation between NO<sub>2</sub> and mobility level during the lockdowns  
17 in early 2020. Though NO<sub>2</sub> level and mobility exhibited similar spatial distribution, our  
18 initial exploration indicated that the decreased mobility level did not always result in  
19 concurrent decreasing NO<sub>2</sub> level during a two-year time period in Southeast Asia with  
20 human movement data at a very high spatial resolution (i.e., Facebook  
21 origin-destination data). It indicated that factors other than mobility level contributed to  
22 NO<sub>2</sub> level decline. Our subsequent analysis used a trained Multi-Layer Perceptron  
23 model to assess mobility and other contributing factors (e.g., travel modes,

24 temperature, wind speed) and predicted future NO<sub>2</sub> levels in Southeast Asia. The  
25 model results suggest that, while as expected mobility has a strong impact on NO<sub>2</sub>  
26 level, a more accurate prediction requires considering different travel modes (i.e.,  
27 driving and walking). Mobility shows two-sided impacts on NO<sub>2</sub> level: mobility above  
28 the average level has a high impact on NO<sub>2</sub>, whereas mobility at a relatively low level  
29 shows negligible impact. The results also suggest that spatio-temporal heterogeneity  
30 and temperature also have impacts on NO<sub>2</sub> and they should be incorporated to  
31 facilitate a more comprehensive understanding of the association between NO<sub>2</sub> and  
32 mobility in the future study.

33

## 34 **1 Introduction**

35 With over 300 million confirmed cases and 5 million deaths, COVID-19 has spread  
36 all over the world since its inception (World Health Organization, 2022). To contain  
37 the COVID-19 outbreak, countries had imposed stringent lockdowns and restriction  
38 measures since 2020 (Lai *et al.*, 2020; R. Zhu *et al.*, 2022). Such public health control  
39 measures have caused an unintended positive consequence in terms of air quality  
40 improvement (Addas and Maghrabi, 2021; Faridi *et al.*, 2021).

41

42 Sharp declines in air pollution level have been observed during the lockdowns in early  
43 2020 (Kanniah *et al.*, 2020; Kumar *et al.*, 2020; Tobías *et al.*, 2020; Zangari *et al.*,  
44 2020; Addas and Maghrabi, 2021; Ghahremanloo *et al.*, 2021; Latif *et al.*, 2021;  
45 Calafiore *et al.*, 2022). Faridi *et al.* (2021) reported that the extent of air pollutant  
46 reduction may vary with the degree of lockdown measures. Wyche *et al.* (2021)  
47 inferred that the NO<sub>2</sub> decline during the UK lockdown period was due to the 70%  
48 vehicle traffic reduction. To investigate the correlation between the observed  
49 concurrent declines in NO<sub>2</sub> and mobility trend, some studies took advantages of the

50 mobility trend datasets (e.g., released by Google and Apple) in interpreting mobility  
51 level and demonstrated its significant positive correlation with NO<sub>2</sub> (Bao and Zhang,  
52 2020; Li and Tartarini, 2020; Zhu *et al.*, 2020).

53

54 Although this large number of studies have observed NO<sub>2</sub> level decline and attributed  
55 the phenomenon to the reduction in mobility level, those studies focus more on the  
56 lockdowns in early 2020. Their investigations that were confined to a short time period  
57 for a few months did not account for other neglected factors which could also  
58 contribute to the observed pattern. Hence, the observed correlation between NO<sub>2</sub> and  
59 mobility was only limited to this short period and may not persist over a longer time  
60 period. Roberts-Semple *et al.*, (2021) reported that NO<sub>2</sub> exhibits seasonal  
61 characteristics in northeastern New Jersey. Zangari *et al.* (2020) found that the NO<sub>2</sub>  
62 level in New York City decreased between January and May in each year since 2015,  
63 with or without the lockdown in early 2020. In addition to temporal changes, mobility  
64 and NO<sub>2</sub> levels vary across regions and countries. By adopting the entire 2020 data in  
65 Singapore, Li *et al.* (2022) did confirm that it would not only overestimate the  
66 correlations between NO<sub>2</sub> and mobility if only focusing on the lockdown time period,  
67 but show significant spatial variations in the correlation between NO<sub>2</sub> and mobility as  
68 well. Thus, there is a demanding need to understand the spatio-temporal heterogeneity  
69 of NO<sub>2</sub> and mobility over a larger geographical area and a longer time period.

70

71 NO<sub>2</sub> is known to cause problems on environment and health (Tian *et al.*, 2019).  
72 Despite various mitigation measures implemented, such air pollutant has been a  
73 long-standing issue in Southeast Asia (SEA) (Kanniah *et al.*, 2020). During the  
74 COVID-19 pandemic, countries in SEA had imposed stringent lockdowns in 2020  
75 along with various restriction measures (e.g., remote working, curfew, restrictions on

76 social gathering and traveling) which limited human movement and activities to a great  
77 extent (Luo *et al.*, 2022). These changes in human behaviours provided an  
78 unprecedented opportunity to study how decrease in citizens' mobility affects air  
79 pollution (Piccoli *et al.*, 2020). Thus, this study aims to perform spatio-temporal  
80 analyses of NO<sub>2</sub> level and mobility in SEA from March 2020 to February 2022 and  
81 develop a NO<sub>2</sub> prediction model to explore its response to key influencing factors.  
82 Different from previous studies, we utilized high-resolution mobility and NO<sub>2</sub> data in  
83 a two-year time period to investigate the long-term NO<sub>2</sub> response in SEA. The study  
84 aims to 1) identify the temporal changes of NO<sub>2</sub> and mobility throughout the two  
85 years of COVID-19 pandemic (March 2020 – February 2022); 2) evaluate the  
86 correlations between NO<sub>2</sub> and mobility; and 3) assess the impact of different factors  
87 on NO<sub>2</sub>.

88

## 89 **2 Materials and methods**

### 90 *2.1 Study area*

91 Our study area consisted of 10 countries within SEA: Brunei, Cambodia, Indonesia,  
92 Laos, Malaysia, Myanmar, the Philippines, Singapore, Thailand, and Vietnam. We  
93 extracted and analysed NO<sub>2</sub> level, mobility, and other factors including travel modes,  
94 temperature, and haze from March 2020 to February 2022. This period was chosen  
95 because of reduced mobility due to government-mandated COVID-19 measures that  
96 occurred in different intensities and timescales across the countries, enabling direct  
97 comparison of mobility impact on NO<sub>2</sub> levels. The whole study area of 770 km<sup>2</sup> was  
98 square gridded to 0.25° for the follow-up analyses (Figure 1).

99

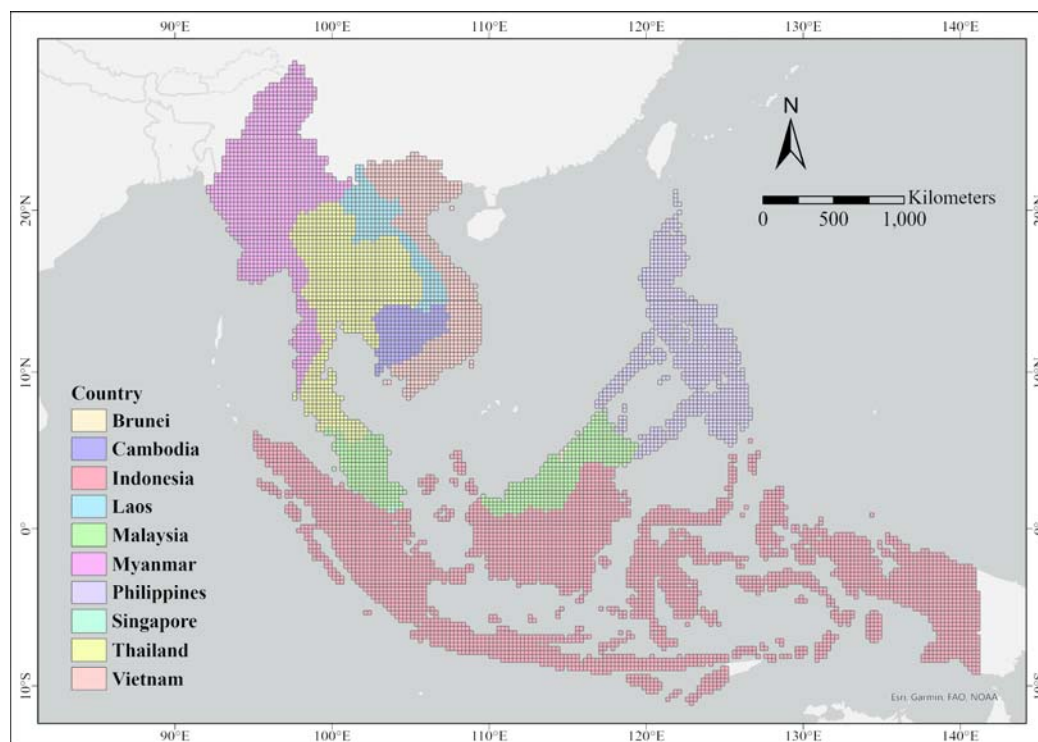

100 *Figure 1. Area of study with coloured grids ( $0.25^\circ \times 0.25^\circ$ ) representing the different*  
101 *countries of interest within SEA.*

## 102 2.2 Data sources and pre-processing

### 103 2.2.1 $NO_2$

104 The level-3 product of daily  $NO_2$  observations (Tropospheric  $NO_2$  column density) of  
105 TROPOMI/Sentinel-5 was obtained from the Google Earth Engine cloud-based  
106 platform. The original data was resampled from the source resolution of  $0.01^\circ$  to  $0.25^\circ$   
107 through mean operator.

### 108 2.2.2 Mobility

109 This study adopted mobility data from Facebook Data for Good at Meta (Maas, 2019)  
110 and Apple Mobility Trends Reports (Apple, 2020). The Facebook movement dataset  
111 records user movements between origin and destination tiles aggregated using  
112 Facebook users' locations every eight hours (8:00, 16:00, 00:00). As the resolution of

113 Facebook's data in different countries varied from level 11 to level 14 (approximately  
114  $0.09^\circ$  to  $0.17^\circ$ ) in Bing tile system (Schwartz, 2018). We aggregated the original  
115 dataset to  $0.25^\circ$  grids by aggregating the mobility volumes within each grid (data  
116 records with 0m distance were excluded). As the dataset only contains information of  
117 the origin and destination rather than the actual movement route, it is difficult to  
118 assign movement value to other grids apart from the origin and destination grids,  
119 especially in long-distance travels. To minimize the inherent uncertainties in longer  
120 distance movements, the subsequent analyses are limited to movements whose origin  
121 and destination belong to the same or neighbouring grids (accounting for 93.33  
122 percent of the total movement volume). The corresponding Facebook movement  
123 values were assigned equally to both starting and ending grids. Apple moving trends  
124 present the percentage changes of two travel modes, driving and walking over time.  
125 Note that, Apple moving trends data is calculated by referring to the number of  
126 searches carried out on its Maps application.

127 Meteorological conditions were reported to affect pollutant concentration (Pearce et  
128 al., 2011; He et al., 2016; Wang et al., 2017). We sourced six meteorological  
129 parameters that could potentially influence  $\text{NO}_2$  level (Jiang et al., 2014; He et al.,  
130 2017) from 1st March 2020 to 31st December 2021: 1) maximum hourly 2m surface  
131 temperature, 2) dew point temperature, 3) mean hourly 10m u-component of wind, 4)  
132 10m v-component of wind, 5) hourly precipitation, and 6) surface pressure. More  
133 specifically, we extracted each of these daily parameters from the ERA5 hourly  
134 reanalysis dataset from the Copernicus Climate Data Store (Copernicus, 2022) and  
135 aggregated them into daily meteorological values respectively.

### 136 2.2.3 Haze

137 Google Trends, an open-source database, was used to retrieve the indexed popularity  
138 of Google searches indicating the public's interest on that topic (Google, 2022). The  
139 English word 'haze' was used to understand the severity of haze at country level. We

140 utilised “pytrends” (an Application Programming Interface for Google Trends) to  
141 extract and scale datasets obtained for different countries, providing compatible  
142 datasets in both space and time (General Mills, 2022). While the values are indexed,  
143 which limits our ability to determine the actual number of searches, the set of varying  
144 values remains a useful proxy for the severity of haze in that location. Other keywords  
145 within and across the national languages were used in the search, but the results were  
146 noisy and excluded. For instance, searches for ‘transboundary haze’ were only  
147 detected in Singapore, Malaysia, and Indonesia, possibly denoting its prevalence only  
148 in those countries, or an issue of lexicons instead. Hence, only the English word ‘haze’  
149 was employed as an approximation to the presence and severity of haze.

150

### 151 *2.3 Data analyses*

152 To address our study objectives, we incorporated three synergistic analyses: (1) a  
153 case study of Indonesia; (2) Space-Time Cube (STC) and Emerging Hotspot  
154 Analysis (EHSA) in SEA; (3) a Multi-Layer Perceptron (MLP) model to predict  
155 NO<sub>2</sub> and assess the impact of different input factors on NO<sub>2</sub>. Due to the constraint  
156 of available data from Facebook movement dataset, we conducted the first two  
157 analyses with limited settings (Table 1). For the first analysis, we conducted a case  
158 study spanning a long time period to identify the temporal changes throughout the  
159 COVID-19 pandemic. Nevertheless, the complete dataset of 2020 is available only  
160 in Indonesia and Singapore. We chose to carry out our case study in Indonesia  
161 considering that it has a much larger spatial area than Singapore. The analysis  
162 expands to 10 countries in SEA from May 2021 because they are available for the  
163 whole of SEA. For the third analysis, our study covers a period between 1st April  
164 2020 and 31st December 2021 because the meteorological data of 2022 was  
165 unavailable at the time this study was conducted.

166 *Table 1. An overview of the corresponding spatial extent, temporal resolution and*  
167 *time period for each analysis.*

| No | Analysis                | Spatial extent | Temporal resolution | Time period                          |
|----|-------------------------|----------------|---------------------|--------------------------------------|
| 1  | Case study of Indonesia | Indonesia      | Monthly             | March 2020 to February 2022          |
| 2  | STC and EHSA            | SEA            | Weekly              | 31st May 2021 to 26th February 2022  |
| 3  | MLP model               | SEA            | Daily               | 1st April 2020 to 31st December 2021 |

168

### 169 *2.3.1 Indonesia case study*

170 As the most populous country in SEA, the case study of Indonesia was conducted to  
171 provide an initial and exploratory understanding of the linkage of mobility and NO<sub>2</sub>  
172 variations between March 2020 and February 2022. The monthly NO<sub>2</sub> data and  
173 Facebook movement data in a spatial resolution of 0.25° were studied across  
174 Indonesia. Ordinary kriging (Wackernagel, 2003) was applied to fill in the grids  
175 without data (Childs, 2004; Shad *et al.*, 2009). A series of continuous raster maps  
176 were generated to facilitate the identification and subsequent interpretation of  
177 potential patterns in Indonesia.

178

### 179 *2.3.2 Space-time hotspot analysis in SEA*

180 We used the EHSA tool in ArcGIS Pro 2.8 software (Esri, 2022) to detect  
181 spatio-temporal trends in NO<sub>2</sub> and Facebook movement within their respective STC.  
182 We conducted this analysis at a weekly interval between 31st May 2021 and 26th  
183 February 2022 over the 10 countries in SEA. We then examined spatial clusters by



184 hot spot categories in greater detail through examining Pearson's correlation between  
185 the log of NO<sub>2</sub> level and the log of Facebook movement values over the 39-week  
186 period for each point in a spatial cluster. As the magnitude of the ranges of NO<sub>2</sub>  
187 (-5.10e-5 to 8.26e-4) and Facebook movement (2.50 to 8.28e+7) could potentially  
188 skew the analysis outcome, we performed data cleaning and transformation as below.  
189 Firstly, NO<sub>2</sub> data points with less than 1e-6 mol/m<sup>2</sup> and Facebook movement values  
190 below 50 were excluded as they were observed as noise (Figure 2). Then we  
191 conducted a logarithmic transformation of base 10 for both variables. Note that before  
192 taken logarithm, the filtered NO<sub>2</sub> data were multiplied by 10e+7 to ensure that data  
193 values remain positive. By removing data anomalies and reducing data skewness,  
194 these transformations improve the accuracy of our analyses.

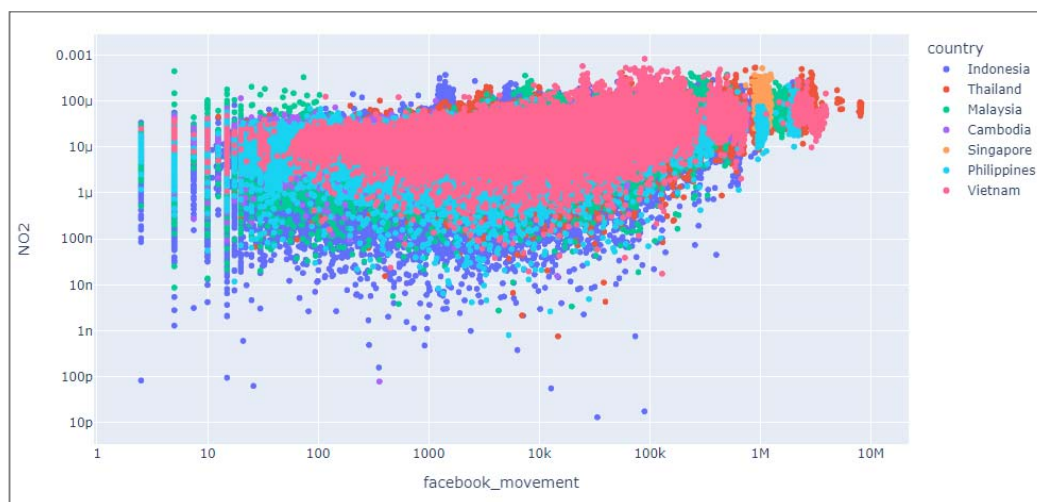

195

196 *Figure 2. Scatter plot between NO<sub>2</sub> and Facebook movement.*

197

### 198 2.3.3 NO<sub>2</sub> prediction in SEA using MLP model

199 In addition to the correlation between NO<sub>2</sub> and mobility, we evaluated the impacts of  
200 different factors on NO<sub>2</sub> using an MLP model. MLP is the most popular feedforward  
201 model with good performance in air pollution prediction and forecasting (Cabaneros  
202 *et al.*, 2019; Shams *et al.*, 2021). It is an artificial neural network (ANN) that consists

203 of an input layer, an output layer, and multiple hidden layers in between. The number  
 204 of nodes in the input layer should be the same as the number of input variables. Input  
 205 variables included 15 parameters (Table 2) across five categories: location (i.e.,  
 206 longitude and latitude), elapsed days (i.e., the number of days since the start of the  
 207 study period), meteorological parameters (i.e., rainfall, wind speed, u-component of  
 208 wind, v-component of wind, temperature, dew-point temperature, surface pressure),  
 209 haze, and mobility (i.e., Facebook movement, the logarithm of Facebook movement,  
 210 Apple driving and walking trends). To improve the model performance of MLP, we  
 211 adopted the same method for data transformation as mentioned in section 2.3.2.

212

213 *Table 2. List of features in MLP model.*

| <b>Feature category</b>   | <b>Feature meaning</b>                             | <b>Feature name</b>   |
|---------------------------|----------------------------------------------------|-----------------------|
| Location                  | Longitude                                          | lon                   |
|                           | Latitude                                           | lat                   |
| Elapsed days              | The number of days since the start of study period | day                   |
| Meteorological parameters | rainfall                                           | rainfall              |
|                           | wind speed                                         | wind speed            |
|                           | u-component of wind                                | u-wind                |
|                           | v-component of wind                                | v-wind                |
|                           | temperature                                        | 2m-temp               |
|                           | dew-point temperature                              | dew-pt                |
| Haze                      | relative number of haze searches                   | haze                  |
|                           | Facebook movement                                  | facebook_movement     |
| Mobility                  | logarithm of Facebook movement                     | log_facebook_movement |
|                           | Apple driving trend                                | apple_driving         |

|  |                     |               |
|--|---------------------|---------------|
|  | Apple walking trend | apple_walking |
|--|---------------------|---------------|

214

215 We used the rectified linear unit (ReLU) activation function in this MLP model.  
216 ReLU outputs negative values to 0 and keeps other values the same as the inputs.  
217 Therefore, we converted all the negative values to positive values using the  
218 transformation method as mentioned in 3.1.2. to improve the model efficiency. By  
219 training different MLP models, we could then determine the optimum model  
220 architecture to be used in this study that resulted in a smaller error with little  
221 additional computational effort. Of all the data records, 70% were used for training  
222 and while the remainder were used for testing. Each input variable was normalised  
223 before training the model. Root mean square error (RMSE), mean absolute error  
224 (MAE) and  $R^2$  were used as the metrics for model evaluation.

225

226 We then used SHapley Additive exPlanation (SHAP) to explain the model in order to  
227 quantify the impact of the different features on the model output (Lundberg and Lee,  
228 2017; Li, 2022). Traditional sensitivity analyses usually evaluate the changes in the  
229 output as a result of the change in only one input parameter. This may not be realistic as  
230 the possible correlation between variables is not accounted for. For example, air  
231 pressure and air temperature tend to increase or decrease together. SHAP values can  
232 account for the possible interactions amongst the input features when evaluating the  
233 impact of each feature on the output. However, it should be noted that the SHAP value  
234 or impact is different from the correlation. A high correlation means that the two  
235 variables tend to change together, while a higher SHAP value indicates a greater  
236 impact of one variable on the other, i.e., a change in one variable results in a greater  
237 magnitude of change in the other. The SHAP results can pinpoint the parameters that  
238 have relatively higher impacts on the  $\text{NO}_2$  level in SEA.

### 239 3 Results & Discussion

#### 240 3.1 Spatio-temporal distribution of NO<sub>2</sub> and mobility level in Indonesia

241 To begin with, we compared the spatio-temporal distribution variations of NO<sub>2</sub> and  
242 Facebook movement levels in Indonesia during March 2020 and February 2022.  
243 Overall, the result showed a decreasing trend during the study period except in March  
244 2021 (Figure 3). On the other hand, NO<sub>2</sub> showed a cyclical trend in 2020 and an  
245 increasing trend in 2021 before reaching peak in October 2021.

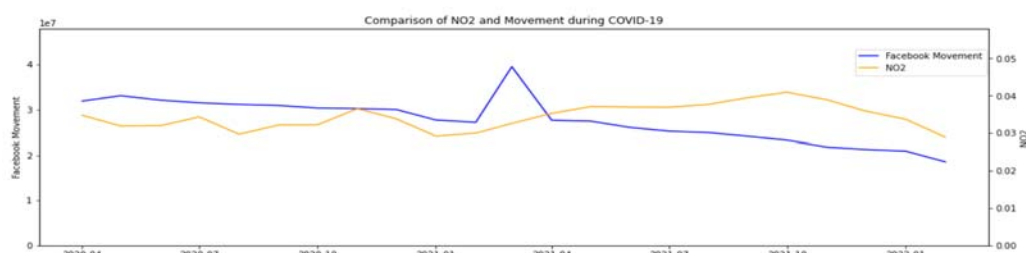

246  
247 *Figure 3. Comparison of Facebook movement and NO<sub>2</sub> in Indonesia.*

248 South and West Indonesia showed high NO<sub>2</sub> levels, especially in Jakarta and its  
249 surrounding regions where the maximum mean NO<sub>2</sub> value reaches 1.01e-04 mol/m<sup>2</sup> in  
250 April 2020 (Figure 4). In comparison, the NO<sub>2</sub> level is substantially lower in other  
251 areas, especially in East Indonesia. Facebook movement presents a similar  
252 distribution. The similarity in distributions of Facebook movement and NO<sub>2</sub> level  
253 suggests a possible association between them.

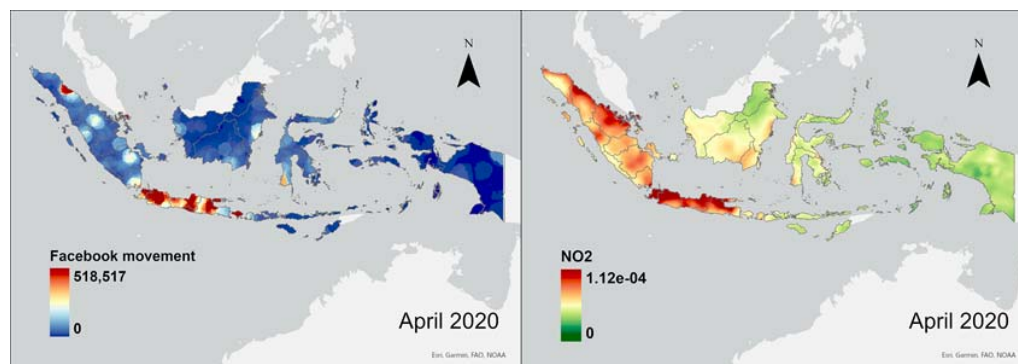

254  
255 *Figure 4. Spatial Distribution of Facebook movement and NO<sub>2</sub> level in April 2020.*

256 Figures 5 and 6 illustrate the temporal changes in Facebook movement and NO<sub>2</sub>  
257 distribution. Maps showing the temporal variations over the last two years are  
258 presented in Appendix A. During the first wave of COVID-19, although Facebook  
259 movement did not vary significantly, NO<sub>2</sub> exhibited an oscillating pattern. Similarly,  
260 in 2021, the Facebook movement constantly decreased ever since March whereas the  
261 NO<sub>2</sub> level did not present a decreasing trend. Moreover, we observed an increase in  
262 NO<sub>2</sub> over the months in regions including Bali, Jawa Barat, Lampung and Kalimantan  
263 Barat. Overall, the temporal variation of NO<sub>2</sub> and Facebook movement did not  
264 present similarity. This result contradicts previous studies in which the reduction of  
265 mobility had led to a decrease in NO<sub>2</sub> level (Sicard *et al.*, 2020; Faridi *et al.*, 2021).  
266 Therefore, we hypothesise that human movement volume may not be the single  
267 significant factor affecting air pollution. For instance, forest fires had occurred in  
268 Indonesia causing air pollution and dryness which pre-matured the onset of haze in  
269 early 2021 (Hicks, 2021).

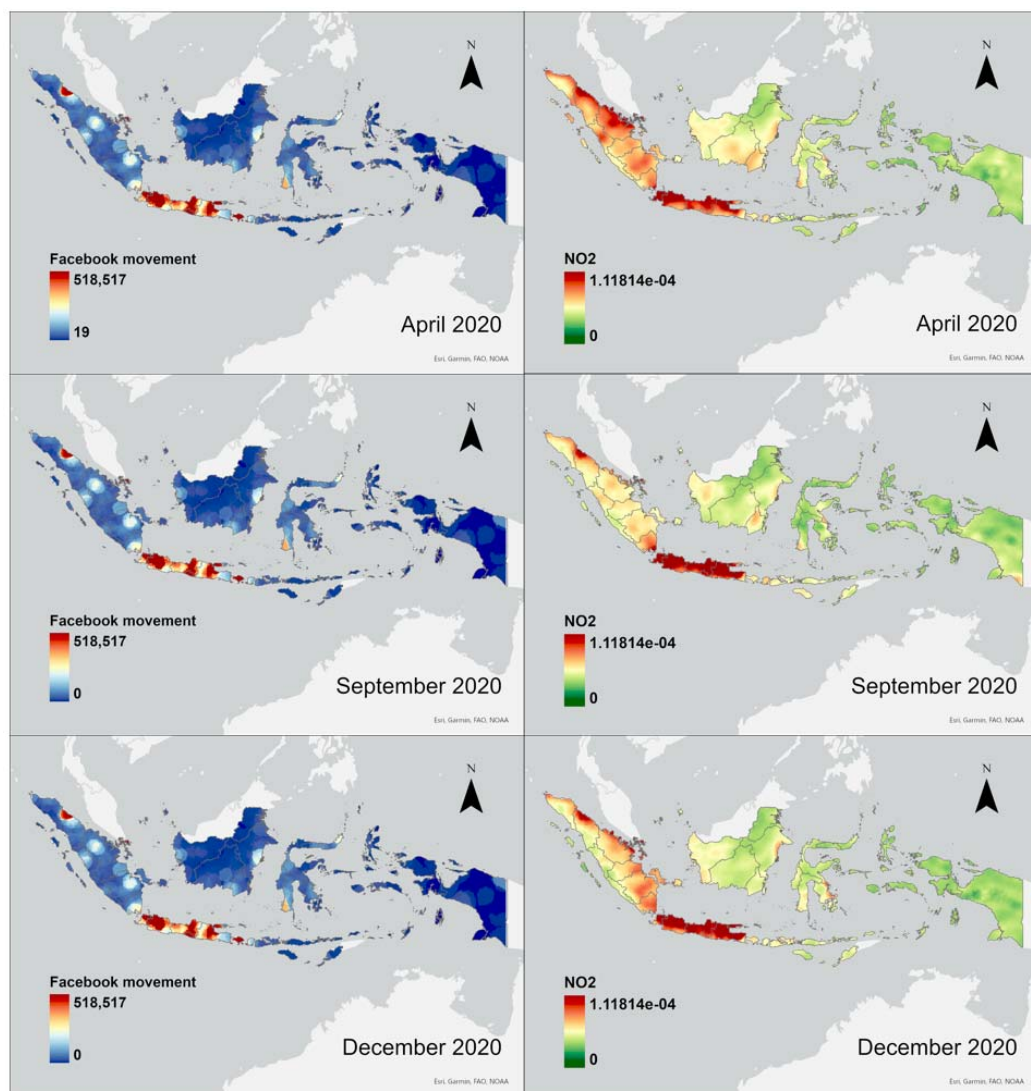

270

271 *Figure 5. Comparison of Facebook movement and NO<sub>2</sub> level during the first wave*

272 *(April 2020 – December 2020) of COVID-19 in Indonesia.*

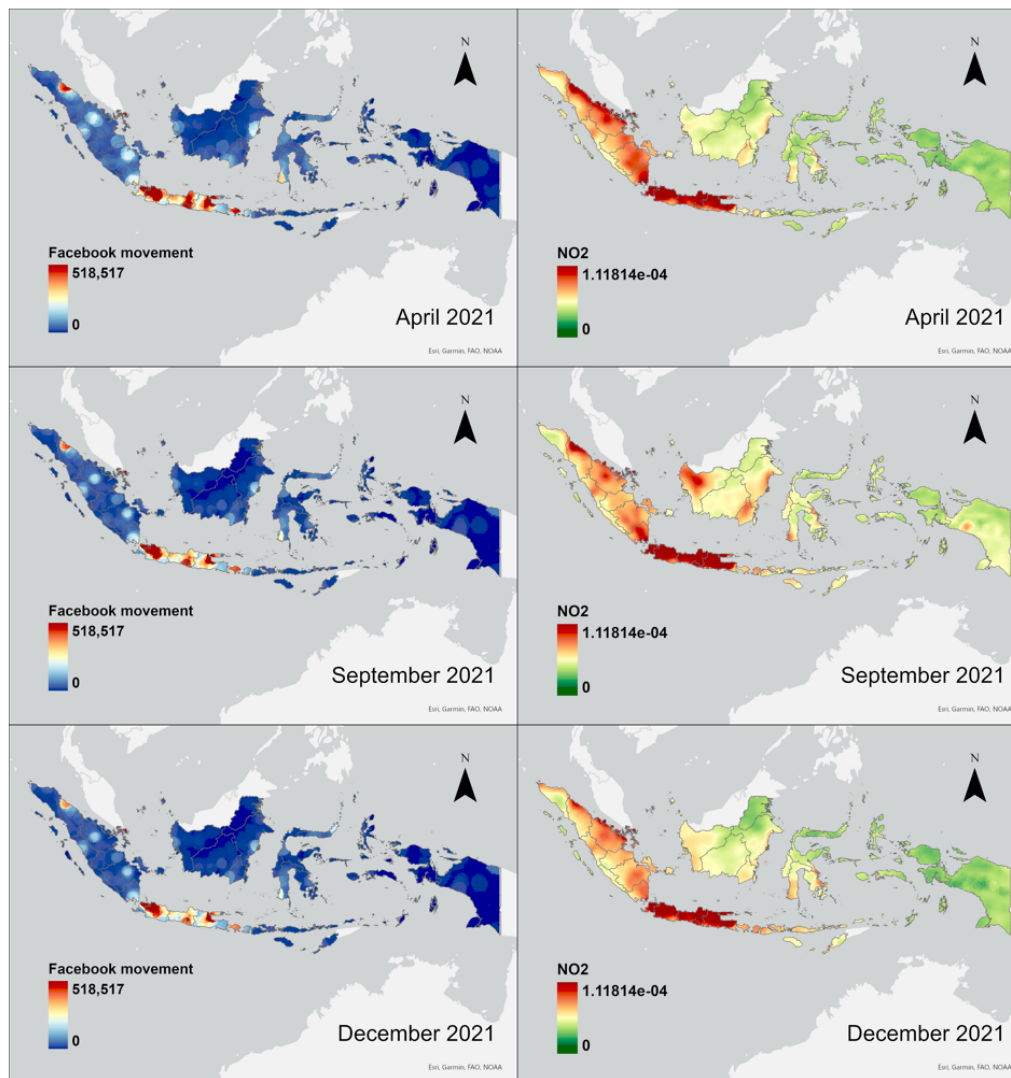

273

274 *Figure 6. Comparison of Facebook movement and NO<sub>2</sub> level during the second wave*

275 *of COVID-19 (April 2021 – December 2021) in Indonesia.*

276

277 3.2 Spatio-temporal evaluation of the association between  $NO_2$  and Facebook  
278 movement trends in SEA

279 Subsequently, we conducted analysis using EHSA at a finer temporal scale (weekly)  
280 in all selected SEA countries. Due to insufficient Facebook movement data, the study  
281 period for this analysis was limited to 31st May 2021 and 26th February 2022. Figure  
282 7 shows the temporal changes in  $\text{Log}(NO_2)$  and  $\text{Log}(\text{Facebook movement})$  during the  
283 study period. Similar to previous findings, there was a consistent pattern of a slight  
284 decrease in Facebook movement throughout the 39-week study period with a sharp  
285 decrease approximately at the 25<sup>th</sup> week in all eight SEA countries (Figure 7). On the  
286 other hand, we found no consistent patterns in  $NO_2$  levels over time. Nonetheless,  
287 there was a slight increase in  $\text{Log}(NO_2)$  approximately around the 20<sup>th</sup> week and the  
288 25<sup>th</sup> week in Thailand and Myanmar respectively.

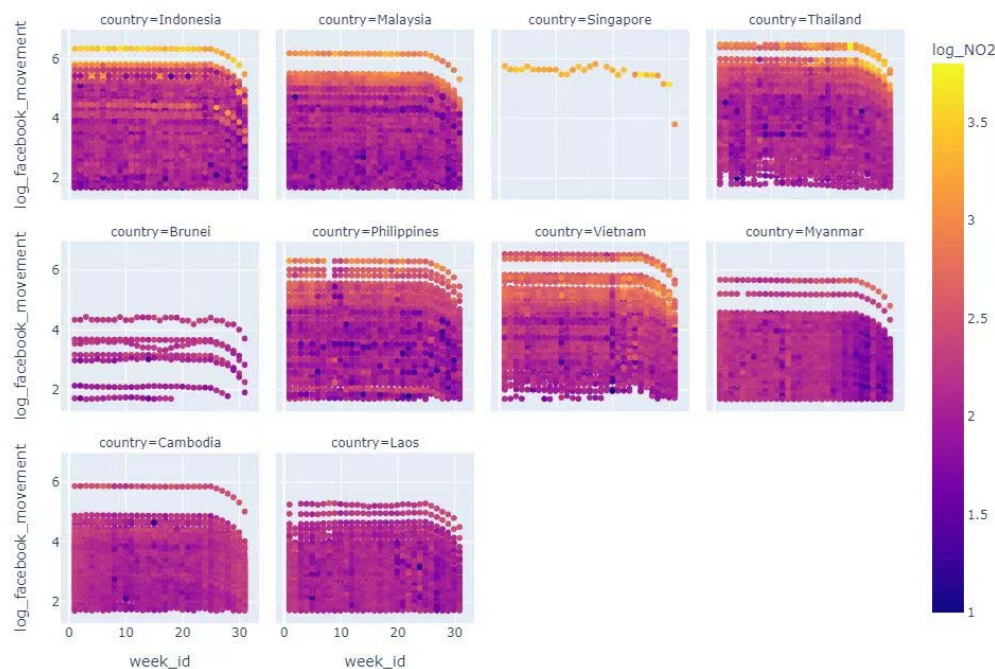

289  
290 *Figure 7. Change in  $\text{Log}(\text{facebook\_movement})$  against  $\text{Log}(NO_2)$  between June 2021*  
291 *and February 2022. Each circle in the figure corresponds to a grid in the country.*  
292 *The darker the circle, the lower the  $\text{Log}(NO_2)$ .*



293

294 From the complete EHSA result derived from the NO<sub>2</sub> level (Figure 8a), it is observed  
295 that hot spots were detected mainly in the northwest of SEA. In comparison, central  
296 and south of SEA, which were mainly covered by Malaysia and Indonesia, were  
297 dominated by cold spots. Several hot spot patterns were identified, including new,  
298 intensifying, persistent and diminishing hot spots (Figure 8b). In terms of the  
299 spatial-temporal patterns of NO<sub>2</sub>, the diminishing hot spots indicate decreasing  
300 clustering intensity of the NO<sub>2</sub> space-time hotspots in a statistically significant trend  
301 over time. Contrastingly, the intensifying hot spots showed a statistically significant  
302 increase in clustering intensity over time.

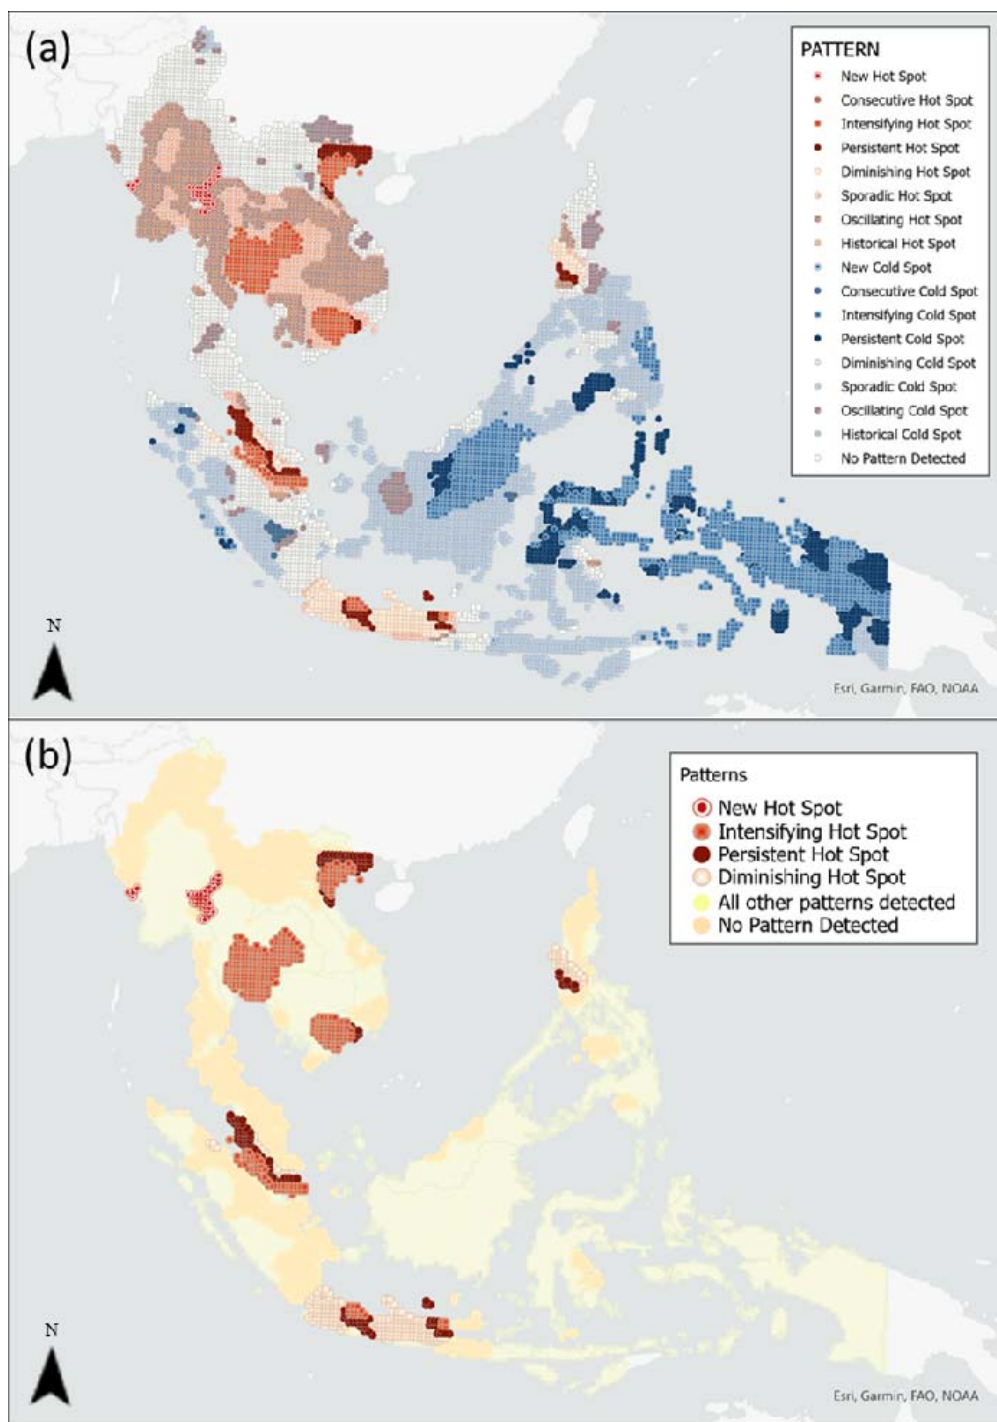

303

304

305 *Figure 8. (a) Complete result of NO<sub>2</sub> EHSAs result and (b) result of NO<sub>2</sub> EHSAs with*

306 *only selected patterns of interest.*

307

308 The complete result of Facebook movement EHSA (Figure 9) is different from that of  
309 NO<sub>2</sub> EHSA (Figure 8a). The Facebook movement EHSA result showed substantially  
310 fewer observed patterns, where only diminishing, sporadic and historical hot spots but  
311 no cold spots were detected. In the context of Facebook movement, diminishing hot  
312 spots indicate that locations of statistically significant mobility hot spots exhibit  
313 decreasing clustering pattern. On the other hand, the sporadic hot spots indicate  
314 locations where statistically significant hot spots were only identified at some  
315 inconsistent time steps. Lastly, historical hot spots indicate locations where the level  
316 of mobility has been detected as statistically significant hot spots for the major time  
317 steps in the past. These hot spots are observed mostly in the major SEA cities such as  
318 Hanoi, Jakarta, Johor and Singapore, where lockdown restrictions would influence  
319 mobility more due to higher population and more intense economic activities (Heroy  
320 et al., 2021). This corroborates with the overall decrease in Facebook movement over  
321 the entire study period (Figure 7).

322

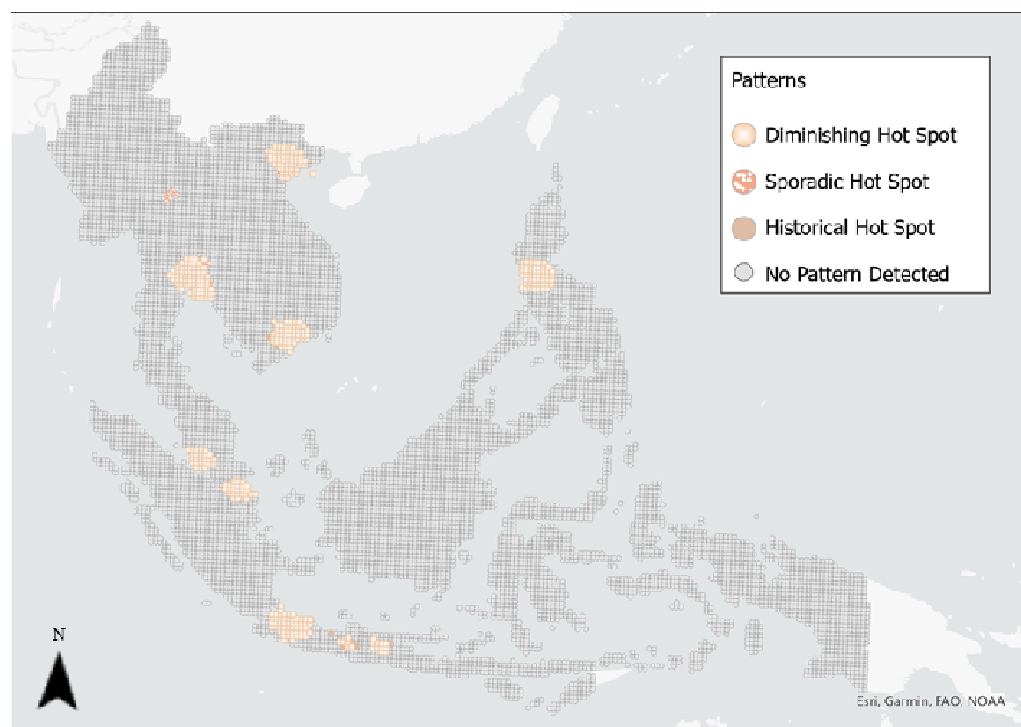

323

324 *Figure 9. Complete EHSA result of Facebook movement.*

325

326 As this study seeks to examine the effect of mobility changes on NO<sub>2</sub>, we conducted  
327 correlation analyses on specific spatio-temporal patterns with reference to the EHSA  
328 results of NO<sub>2</sub>. While several types of NO<sub>2</sub> spatio-temporal hot spots were identified  
329 using EHSA, the correlation between Log(NO<sub>2</sub>) and Log(Facebook movement) varied  
330 widely geographically from June 2021 to February 2022. Such variation was observed  
331 within a country and even within a city.

332

333 In the case of the intensifying hot spots, while positive correlation between Log(NO<sub>2</sub>)  
334 and Log(Facebook movement) was observed in Chon Buri province, Thailand, a mix  
335 of positive and negative correlations were observed in the Rayong and Chanthaburi  
336 provinces, Thailand (Figure 10). This trend did not support the previous findings that  
337 the degree of movement restriction correlates positively with NO<sub>2</sub> level. In fact, the  
338 same spatial cluster of NO<sub>2</sub> intensifying hot spots in Chon Buri and Rayong were  
339 identified as diminishing hot spots or no pattern detected in the Facebook movement  
340 EHSA result (Figure 9). While NO<sub>2</sub> levels at these locations became stronger hot  
341 spots over time, the corresponding mobility hot spots became less clustered. This  
342 contrasting observation further confirms that there is lack of evidence supporting a  
343 direct association between mobility and the resultant NO<sub>2</sub> levels.

344

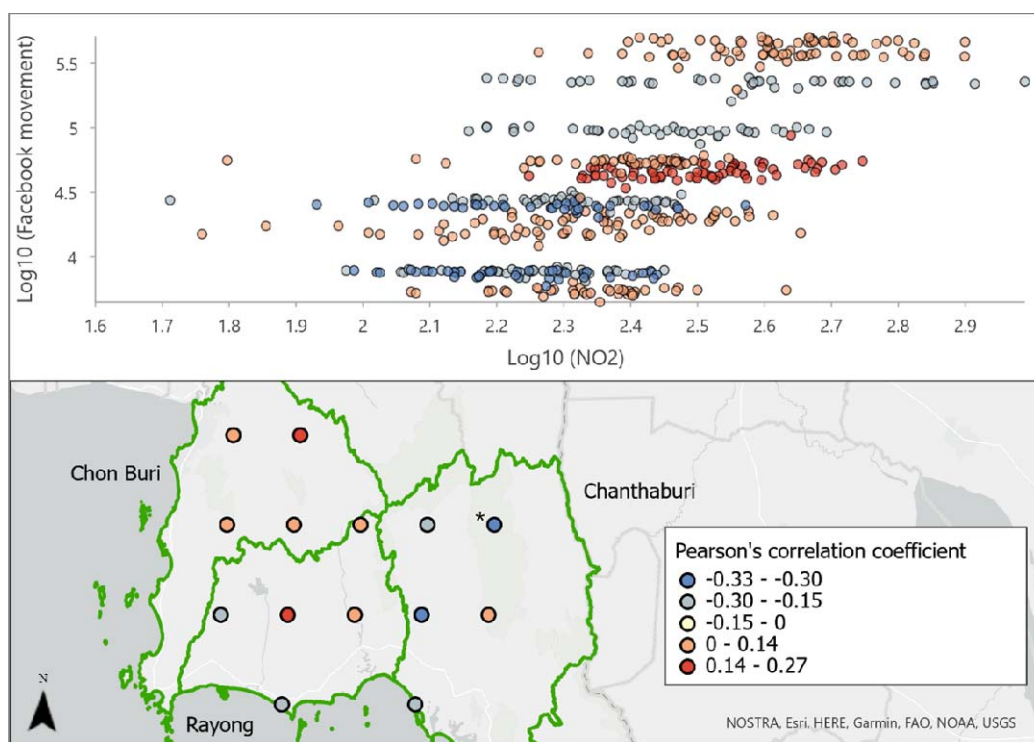

345

346 *Figure 10. Correlation between Log(Facebook movement) and Log(NO<sub>2</sub>) in*  
347 *intensifying hot spots in Thailand.*

348

349 Variation in correlation was also observed among the persistent hot spots in the  
350 provinces around Ha Noi in Vietnam (Figure 11), and the new hot spots were found  
351 along the border between Thailand and Myanmar (Figure 12). While the persistent hot  
352 spots indicated statistically significant higher NO<sub>2</sub> levels relative to their space-time  
353 neighbours over most of the 39 weeks without discernible trends, the new hot spots  
354 indicate a statistically significant space-time hotspot only in the last time step and not  
355 in any of the previous ones. Yet, the weak positive correlation and moderate negative  
356 correlations between Log(NO<sub>2</sub>) and Log(Facebook movement) show insubstantial  
357 evidence to attribute the changes in NO<sub>2</sub> levels to the changes in mobility. Likewise,  
358 these locations were identified as the diminishing hot spots or absence of space-time  
359 pattern in the Facebook movement EHSA result (Figure 9). This similarly suggests

360 that while mobility hot spot intensity decreased in these points, the NO<sub>2</sub> hot spot  
361 intensity stayed relatively constant over time.

362

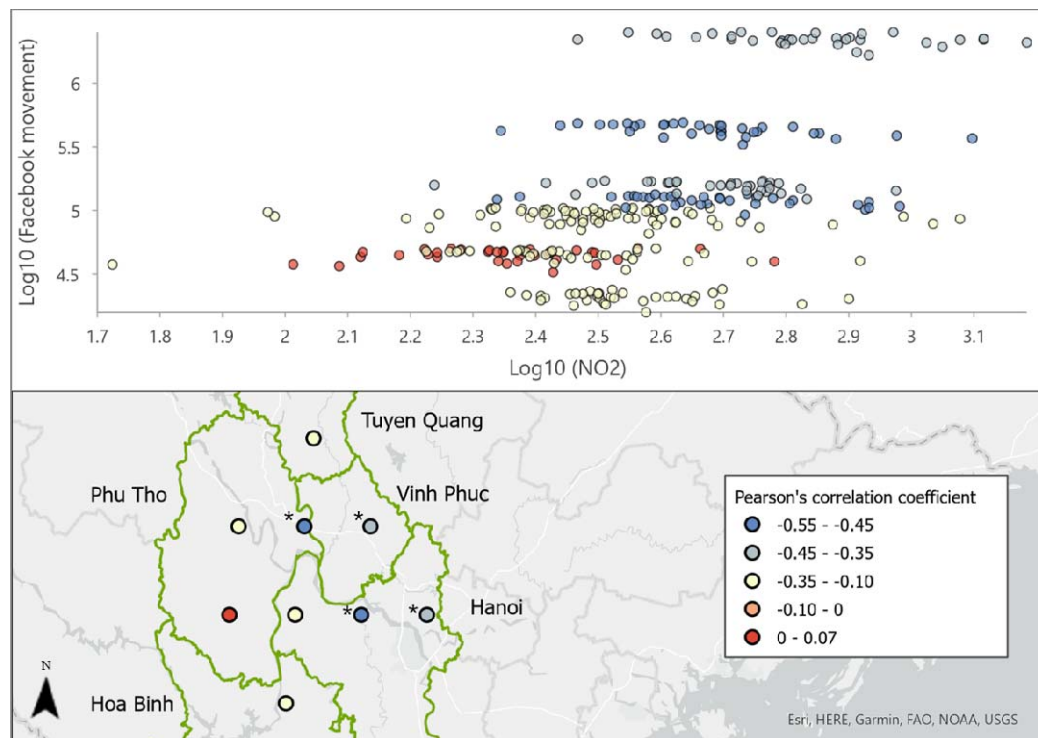

363

364 *Figure 11. Correlation between Log(Facebook movement) and Log(NO<sub>2</sub>) in persistent*

365 *hot spots in Vietnam.*

366

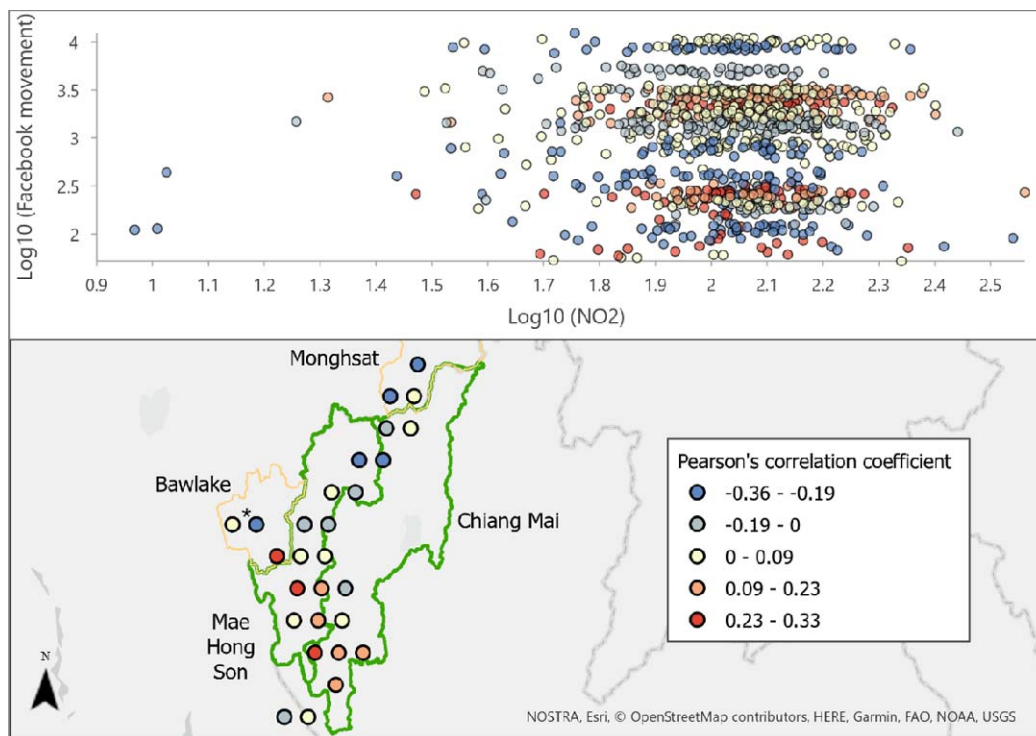

367

368 *Figure 12. Correlation between log (Facebook movement) and log (NO<sub>2</sub>) in new hot*  
369 *spots in Thailand and Myanmar.*

370 In the case of the diminishing hot spots, we detected two clusters of points in  
371 Indonesia (Figure 13) and Malaysia (Figure 14), which exhibit positive correlations  
372 between Log(NO<sub>2</sub>) and Log(Facebook movement). In addition, the corresponding  
373 points were also identified as the diminishing hot spots in the EHSA results of the  
374 Facebook movement. This suggests that both NO<sub>2</sub> levels and Facebook movement  
375 decrease over time, validating the positive correlation between these two variables.

376

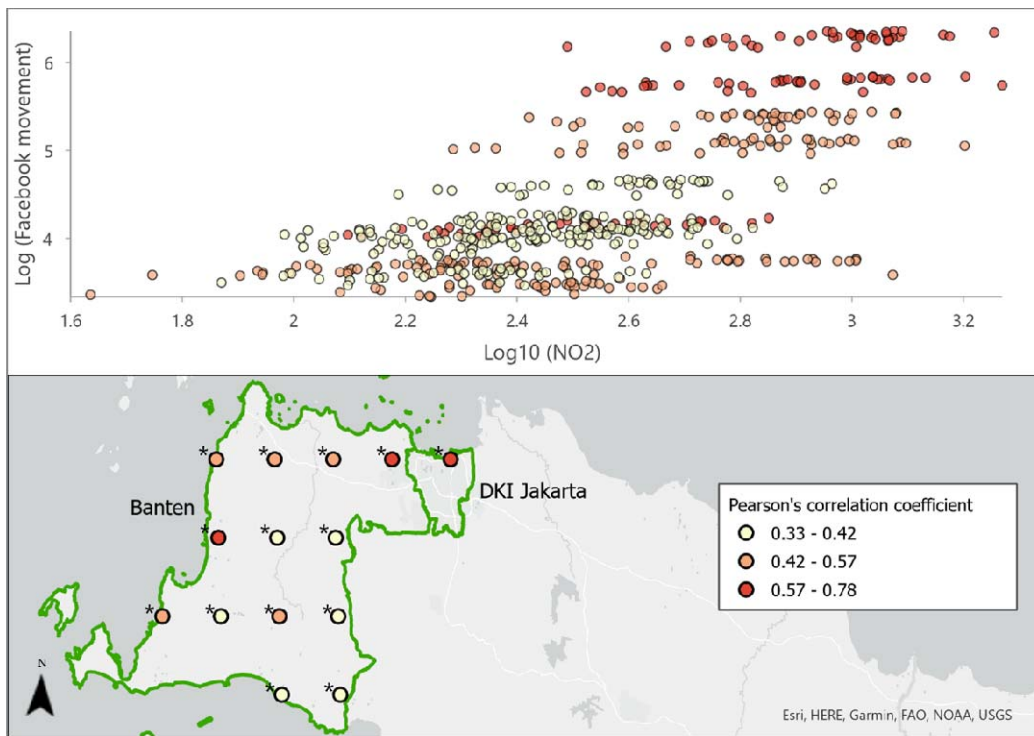

377

378 *Figure 13. Correlation between Log(Facebook movement) and Log(NO<sub>2</sub>) in*

379 *diminishing hot spots Indonesia.*



380

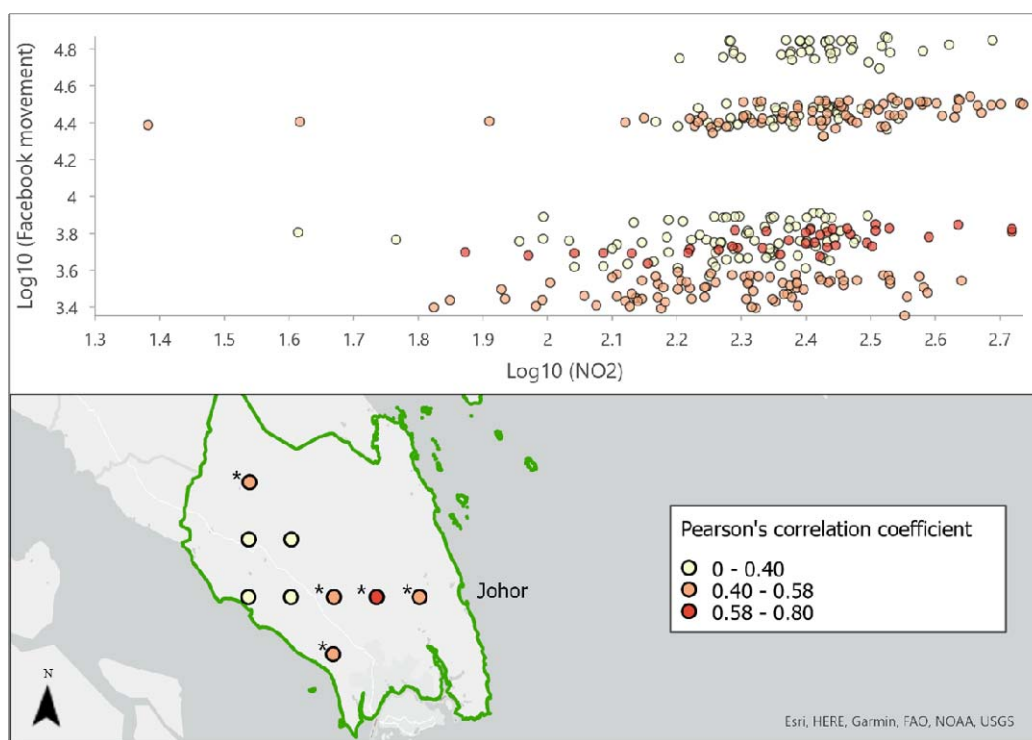

381

382 *Figure 14. Correlation between Log(Facebook movement) and Log(NO<sub>2</sub>) in*  
383 *diminishing hot spots in Malaysia.*

384 Overall, these spatially explicit exploration of the correlation between NO<sub>2</sub> levels and  
385 mobility spatio-temporal trends revealed inconsistent patterns between June 2021 and  
386 February 2022, which approximates the period of the COVID-19 Delta and emerging  
387 Omicron variants. Further inspection of the correlation coefficients revealed that the  
388 observed correlations were only statistically significant for NO<sub>2</sub> diminishing hot spots  
389 and the negatively correlated NO<sub>2</sub> persistent and new hot spots. Therefore, we  
390 postulate that our SEA-wide EHSA results reinforce the findings from Li *et al.* (2022)  
391 where a national-scale spatial variability in correlations between NO<sub>2</sub> levels and  
392 mobility was observed. This strongly indicates that mobility alone could not fully  
393 explain the resultant NO<sub>2</sub> level changes over time and space.

394

395 3.3 NO<sub>2</sub> prediction and its sensitivity to different influential factors

396 The previous two sections suggest that mobility is not the single influencing factor on  
 397 the NO<sub>2</sub> variation over time. We further explored the association between NO<sub>2</sub> and  
 398 other potential factors using the MLP model. Firstly, the correlation coefficients  
 399 between each pair of variables were calculated and plotted as a heatmap (Figure 15).  
 400 Log(facebook\_movement) is the variable that has the strongest correlation with both  
 401 Log(NO<sub>2</sub>) and NO<sub>2</sub> (i.e., the correlation coefficient of 0.45 and 0.42, respectively). In  
 402 comparison, Apple driving and walking trends have a much weaker correlation with  
 403 Log(NO<sub>2</sub>) (i.e., the correlation coefficient of -0.13 and -0.02, respectively). However,  
 404 Apple driving trend is strongly correlated to Apple walking trend, with a correlation  
 405 coefficient of 0.73. This shows that Apple driving and Apple walking trends are very  
 406 likely to increase or decrease together. Apart from the three mobility factors,  
 407 longitude, latitude and temperature also showed a relatively strong correlation with  
 408 NO<sub>2</sub> and Log(NO<sub>2</sub>).

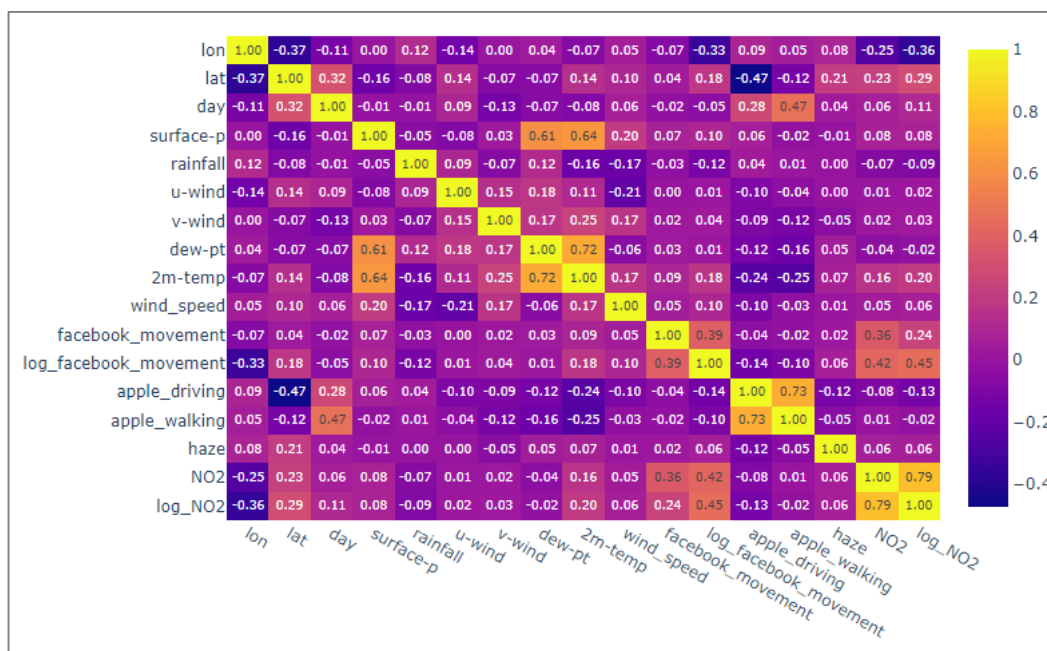

409

410 Figure 15. Correlation matrix between any pair of variables.

411 After calculating the coefficients, 15 features (Table 2) were used to predict the  
 412 output NO<sub>2</sub> in the MLP model. The model architecture consists of 18 hidden layers  
 413 with a range of 8 to 64 nodes in each layer, and a total of 14,793 trainable parameters.  
 414 Figure 16 plots the predicted and the measured ground-truth output values in both the  
 415 training and testing datasets. A higher difference was observed at low Log(NO<sub>2</sub>)  
 416 levels. Table 3 summarized the performance of both the training and testing datasets  
 417 where the high similarity between their respective RMSE and MAE values suggests  
 418 that no overfitting was found.

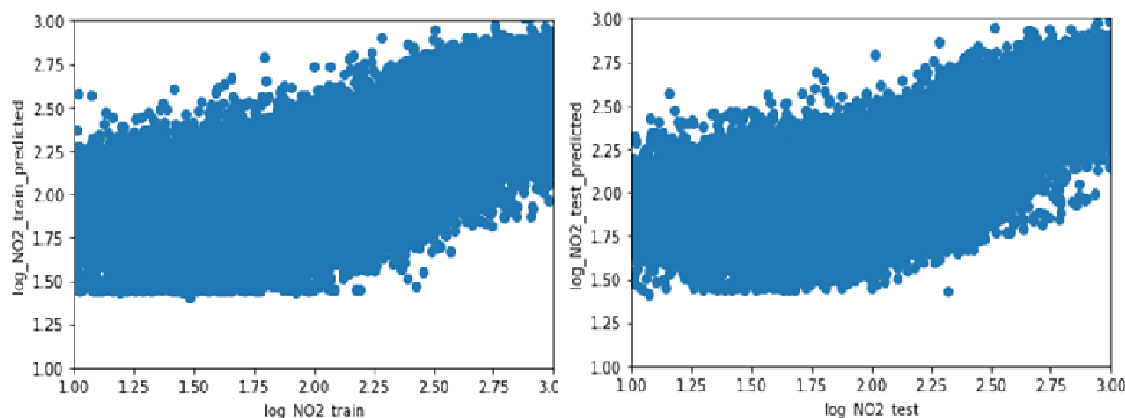

419

420 *Figure 16. The predicted and measured Log(NO<sub>2</sub>) in the training (left) and testing*  
 421 *(right) dataset.*

422 *Table 3. Performance of the MLP model on training and testing dataset.*

|       | <b>RMSE<br/>(NO<sub>2</sub>;<br/>mol/m<sup>2</sup>)</b> | <b>RMSE<br/>(Log(NO<sub>2</sub>))</b> | <b>MAE<br/>(NO<sub>2</sub>;<br/>mol/m<sup>2</sup>)</b> | <b>MAE<br/>(Log(NO<sub>2</sub>))</b> | <b>R<sup>2</sup><br/>(NO<sub>2</sub>)</b> | <b>R<sup>2</sup><br/>(Log(NO<sub>2</sub>))</b> |
|-------|---------------------------------------------------------|---------------------------------------|--------------------------------------------------------|--------------------------------------|-------------------------------------------|------------------------------------------------|
| Train | 1.03e-05                                                | 0.22                                  | 5.03e-06                                               | 0.16                                 | 0.49                                      | 0.52                                           |
| Test  | 1.02e-05                                                | 0.22                                  | 5.02e-06                                               | 0.16                                 | 0.49                                      | 0.52                                           |

423

424 The prediction error was evaluated by calculating the difference between the  
 425 predicted and measured ground truth values in the testing dataset. The histogram of  
 426 prediction error shows that most errors fall between -0.5 and 0.5 (Figure 17). A

427 coloured distinction was used to differentiate observations with large prediction errors  
428 ( $> 0.5$  or  $< -0.5$ ) from those with small prediction errors (Figure 18). This distinction  
429 revealed that large errors concentrate at column densities lower than  $1e-5.5 \text{ mol/m}^2$   
430 (or  $\log(\text{NO}_2) < 1.5$ ). A measured  $\text{NO}_2$  column density of  $1e-5.5 \text{ mol/m}^2$  could be  
431 overestimated as  $1e-5 \text{ mol/m}^2$ . On the other hand, measurements also have uncertainty.  
432 By comparing with ground measurements, the uncertainty in measurement was about  
433  $1e-5 \text{ mol/m}^2$  (Tonion & Pirotti, 2022). While our prediction error occurred mostly at  
434 small  $\text{NO}_2$  column densities and was within the range of measurement uncertainty,  
435 this implies that the trained model performs well in predicting most of the  $\text{NO}_2$  levels  
436 and can generalise such prediction without overfitting the models.

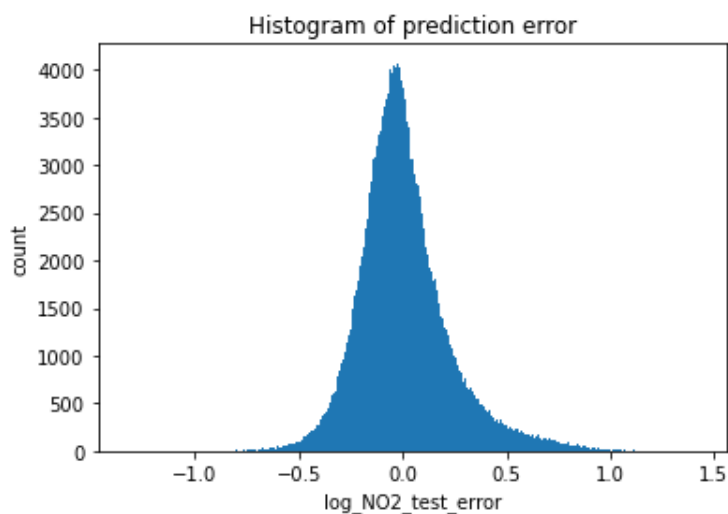

437  
438 *Figure 17. Histogram of prediction errors in the testing dataset.*

439

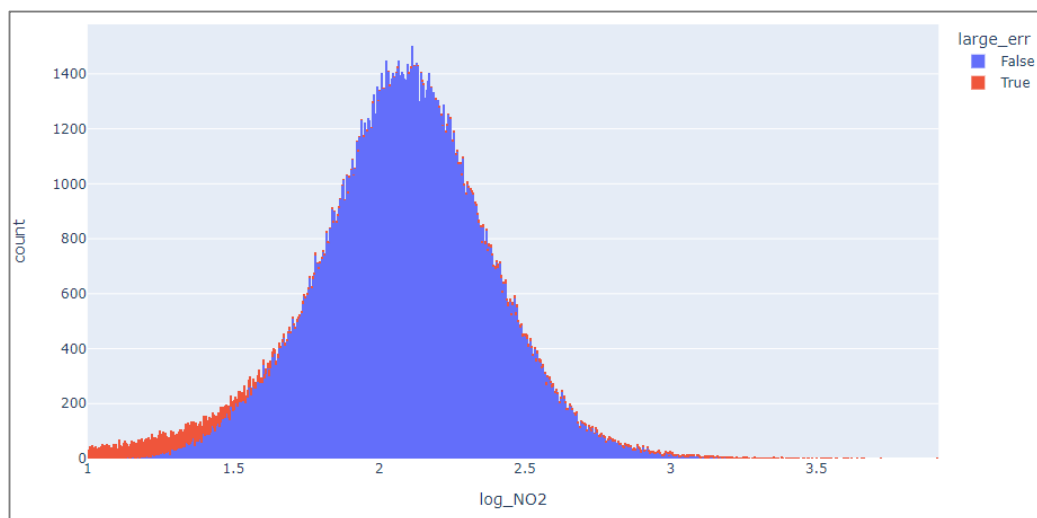

440

441 *Figure 18. The distribution of large errors in the measured  $\text{Log}(\text{NO}_2)$  in the testing*  
442 *dataset.*

443

444 Subsequently, data records with high  $\text{Log}(\text{NO}_2)$  were sliced as a new dataset to  
445 investigate its association with different parameters. This included 6362  $\text{Log}(\text{NO}_2)$   
446 records ranging between 2.48 to 2.50 with small prediction error, representing a  
447 subset of data reliably predicted by the model. SHAP values were calculated for each  
448 parameter in each record representing the magnitude of impact each parameter has on  
449 the output  $\text{Log}(\text{NO}_2)$ .

450

451 The spatial (i.e., lat and lon) and temporal information (i.e., day) had the highest  
452 impacts on the output  $\text{Log}(\text{NO}_2)$  according to the global interpretation summary  
453 (Figure 19). This reinforces the importance of spatial and temporal information in  
454 predicting  $\text{NO}_2$  levels. Besides spatial and temporal parameters, the next highest  
455 contributing parameters were mobility factors (i.e., apple\_walking, apple\_driving and  
456 facebook\_movement). Specifically, the Apple moving trends had higher impacts on  
457  $\text{NO}_2$  as compared to the Facebook movement. As mentioned, Facebook movement  
458 data has higher spatial resolution than Apple's. Although the latter is coarser in

459 resolution, it distinguished different travel modes (i.e., driving and walking). The  
460 comparatively higher impacts of Apple moving trends on  $\text{Log}(\text{NO}_2)$  suggest that  
461 distinguishing different travel modes is important in predicting  $\text{NO}_2$ . Additionally,  
462 other factors especially temperature also showed impacts to a certain extent on this  
463 model, although their impact is overall lower compared to spatio-temporal factors and  
464 most of the mobility factors.

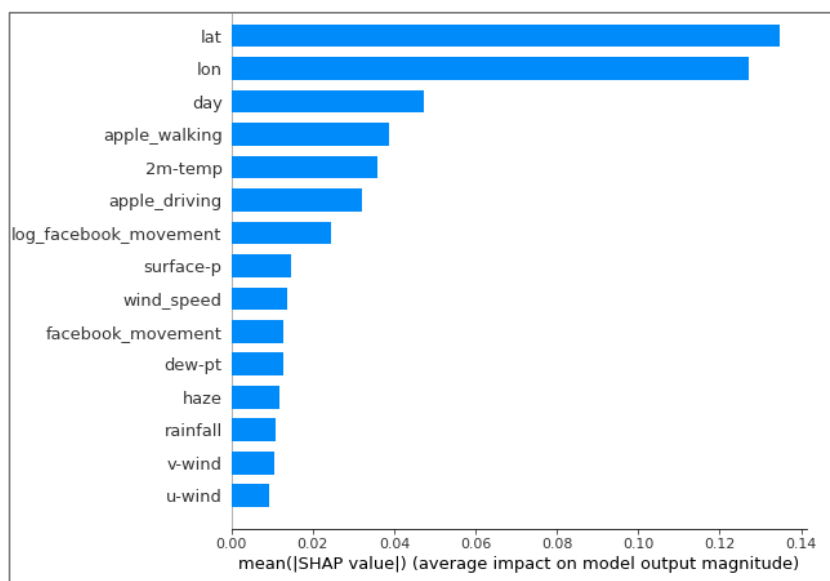

465

466 *Figure 19. A summary plot of impacts of each parameter on  $\text{Log}(\text{NO}_2)$ .*

467 The dependence plot in Figure 20 shows that when  $\text{Log}(\text{facebook\_movement})$  is  
468 below the average value (normalised to 0), both facebook movement and apple  
469 moving trend hardly have any impact on  $\text{NO}_2$ . In other words, the impact of change in  
470 mobility parameters on  $\text{NO}_2$  is more detectable at higher movement level. On the  
471 other hand, this impact on  $\text{NO}_2$  could be different at the same total movement level.  
472 For instance, when  $\text{Log}(\text{facebook\_movement})$  was above the mean value, the blue  
473 points (lower level of Apple driving trend) have lower SHAP values compared to the  
474 pink points (higher level of Apple driving trend). This suggests that when total  
475 mobility is contributed less by the driving trend, an increase in total mobility could be  
476 contributed more by the walking trend instead. Therefore, there tends to be a lower  
477 resultant impact on  $\text{NO}_2$  levels.

478

479 In addition, the impact of Apple walking trend on  $\text{Log}(\text{NO}_2)$  in Figure 21 shows that  
480 there is a negative impact on  $\text{Log}(\text{NO}_2)$  when the walking trend decreases. The  
481 different interactions of Apple driving and Apple walking indicated that this negative  
482 impact on  $\text{Log}(\text{NO}_2)$  from a decreased walking trend could be attributed to the  
483 concurrent decrease in Apple driving trend (in blue colour).

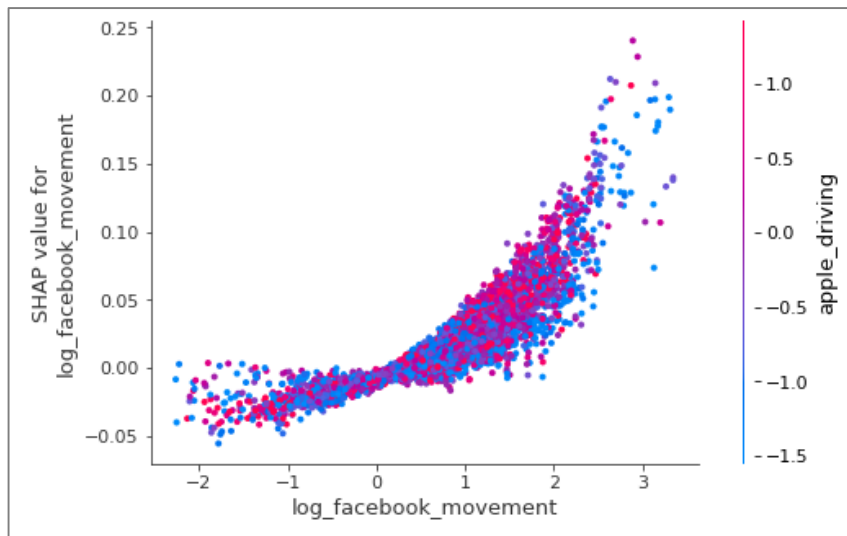

484

485 *Figure 20. Impact of  $\text{Log}(\text{facebook\_movement})$  on  $\text{Log}(\text{NO}_2)$  represented by the*  
486 *SHAP values at different  $\text{Log}(\text{facebook\_movement})$  values along the x-axis, and its*  
487 *interactions with Apple driving trend (in colour).*

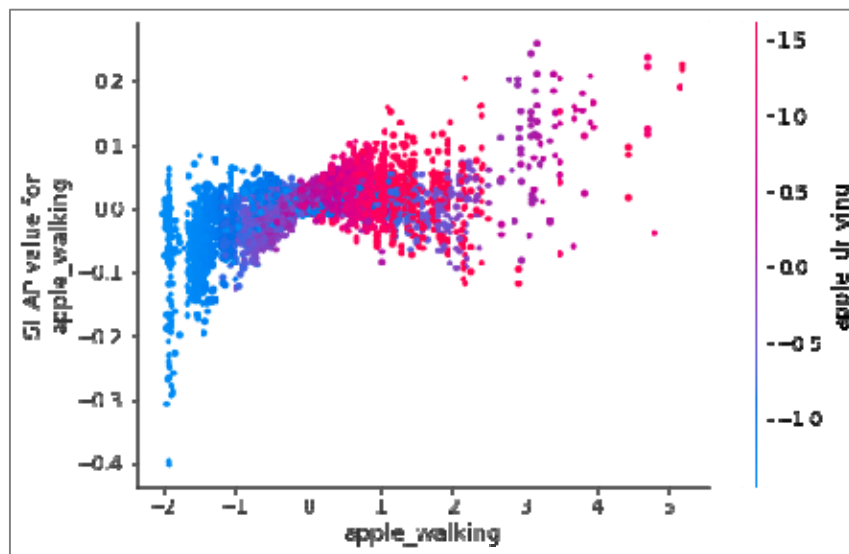

488

489 *Figure 21. Impact of Apple walking trend on  $\text{Log}(\text{NO}_2)$  represented by the SHAP*  
490 *values at different apple\_walking values along the x-axis, and its interactions with*  
491 *Apple driving trend (in colour).*

492

#### 493 **4 Conclusions**

494 The various lockdowns and movement restrictions during the COVID-19 pandemic  
495 present an opportunity to study how air pollution varies along with the decrease of  
496 mobility. Although existing studies have conducted analysis during the lockdowns in  
497 early 2020 and observed a positive correlation between  $\text{NO}_2$  and mobility. Given that  
498 their study period was confined to a short time period, their observation may be  
499 subject to other under-examined factors. Therefore, we investigated the variability of  
500  $\text{NO}_2$  at a very large spatial scale with diverse human movement patterns in a two-year  
501 study time period. We found that mobility showed decreasing trend during the  
502 COVID-19 pandemic in Indonesia. However, the decreased mobility did not generally  
503 result in concurrent decrease in  $\text{NO}_2$  during the two years. Our EHSA results revealed  
504 the spatio-temporal heterogeneity in  $\text{NO}_2$  levels and mobility in SEA during June  
505 2021 and February 2022. The variability in Pearson's correlation coefficient further  
506 indicated the absence of a definitive correlation between  $\text{NO}_2$  and Facebook



507 movement. The subsequent MLP result suggests that mobility with distinguished  
508 travel modes substantially influenced the MLP model and NO<sub>2</sub> prediction. Moreover,  
509 the impact of mobility on NO<sub>2</sub> varies with mobility level. When mobility is below the  
510 average level, its impact on NO<sub>2</sub> becomes negligible. This may be another reason why  
511 the decrease in mobility did not result in any expected correlated decrease in NO<sub>2</sub> in  
512 general.

513

514 Our findings denoted that the reduced mobility during COVID-19 pandemic did  
515 contribute to the variation of NO<sub>2</sub>. Nevertheless, other meteorological factors  
516 especially temperature also had considerable impacts and should be considered along  
517 with mobility when attempting to understand NO<sub>2</sub> variation. Although SEA countries  
518 are gradually loosening movement and other restrictions to restore industry activities  
519 and economy (Luo *et al.*, 2022), traffic control is still a recommended solution for  
520 regions suffering from poor air quality. Additionally, our model provides an accurate  
521 NO<sub>2</sub> prediction method, which could be adopted as a health risk warning system in  
522 preventing possible exposure to high concentration of NO<sub>2</sub>.

523

524 There are three main limitations in this study and further investigations are  
525 recommended. Firstly, our study mainly estimated the movement value in adjacent  
526 study grids, excluding long distance travels. Although daily commuting in adjacent  
527 grids accounts for most of the movement value (93.33 percent), this would cause  
528 some uncertainty in actual movement volume estimation. Future studies could adopt  
529 other datasets that include specific mobility trajectories to account for long distance  
530 travel patterns and reduce uncertainty. Secondly, as this study seeks to examine the  
531 spatio-temporal changes in NO<sub>2</sub> levels, only specific patterns of hot spots (i.e., new,  
532 intensifying, persistent and diminishing hot spot) were selected for correlation

533 analyses. Other studies could examine the correlation between NO<sub>2</sub> and mobility  
534 levels for other patterns of hot spots and even the cold spots to potentially elicit more  
535 insights. Finally, this study did not adopt a spatio-temporal machine learning model  
536 due to the discontinuous Facebook movement data (i.e., most countries have missing  
537 data before May 2021) during the two-year study period. Future studies are  
538 recommended to adopt a hybrid model (e.g., convolutional neural network (CNN) and  
539 long short-term memory (LSTM)) for NO<sub>2</sub> prediction. Nonetheless, it presented  
540 timely and novel evidence that the spatial and temporal information were strong  
541 factors in explaining NO<sub>2</sub> levels. Future scholars are recommended to adopt a hybrid  
542 model (e.g., convolutional neural network (CNN) and long short-term memory  
543 (LSTM)) in NO<sub>2</sub> prediction to account for the interactions of NO<sub>2</sub> with time and  
544 space.

545

546 Source codes related to this study can be found on a public GitHub repository  
547 ([https://github.com/liyangyang515/Spatio-Temporal-Patterns-of-NO<sub>2</sub>-and-Mobility-Through-the-Variants-of-COVID-19-in-SEA](https://github.com/liyangyang515/Spatio-Temporal-Patterns-of-NO2-and-Mobility-Through-the-Variants-of-COVID-19-in-SEA)).

549

## 550 **Acknowledgements**

551 The Facebook Movement between Tiles data are not publicly available, the  
552 permission of usage was granted by Facebook Data for Good Partner Program.

553

554 **References**

- 555 Addas, A., & Maghrabi, A. (2021). The Impact of COVID-19 Lockdowns on Air  
556 Quality—A Global Review. *Sustainability*, 13(18), 10212.  
557 <https://doi.org/10.3390/su131810212>
- 558 Apple. (2020). COVID-19 Mobility Trends Reports. Retrieved from  
559 <https://www.apple.com/covid19/mobility>. Accessed April 7, 2022
- 560 Archer, C., Cervone, G., Golbazi, M., Al Fahel, N. & Hultquist, C. (2020). Changes  
561 in air quality and human mobility in the USA during the COVID-19 pandemic.  
562 *Bulletin of Atmospheric Science and Technology*, 1(3), pp.491-514.  
563 <https://doi-org/10.1007/s42865-020-00019-0>
- 564 Bao, R., & Zhang, A. (2020). Does lockdown reduce air pollution? Evidence from 44  
565 cities in northern China. *Science of The Total Environment*, 731, 139052.  
566 <https://doi.org/10.1016/j.scitotenv.2020.139052>
- 567 Bekkar, A., Hssina, B., Douzi, S. & Douzi, K. (2021), Air-pollution prediction in  
568 smart city, deep learning approach, *Journal of Big Data*, vol. 8, no. 1.  
569 <https://doi.org/10.1186/s40537-021-00548-1>
- 570 Cabaneros, S.M., Calautit, J.K. and Hughes, B.R., 2019. A review of artificial neural  
571 network models for ambient air pollution prediction. *Environmental*  
572 *Modelling & Software*, 119, pp.285-304.  
573 <https://doi.org/10.1016/j.envsoft.2019.06.014>
- 574 Cahyadi, M.N., Handayani, H.H., Warmadewanthi, I., Rokhmana, C.A., Sulistiawan,  
575 S.S., Walodjo, C.S., Raharjo, A.B., Endroyono, Atok, M., Navisa, S.C.,  
576 Wulansari, M. & Jin, S. (2022). Spatiotemporal Analysis for COVID-19 Delta  
577 Variant Using GIS-Based Air Parameter and Spatial Modeling, *International*

578 Journal of Environmental Research and Public Health, vol. 19, no. 3, p. 1614.  
579 <https://doi.org/10.3390/ijerph19031614>

580 Calafiore, A., Macdonald, J. L., & Singleton, A. (2022). Decomposing the Temporal  
581 Signature of Nitrogen Dioxide Declines during the COVID-19 Pandemic in  
582 UK Urban Areas. *Applied Spatial Analysis and Policy*.  
583 <https://doi.org/10.1007/s12061-022-09438-2>

584 Casquero-Vera, J.A., Lyamani, H., Titos, G., Borrás, E., Olmo, F.J. &  
585 Alados-Arboledas, L. (2019). Impact of primary NO<sub>2</sub> emissions at different  
586 urban sites exceeding the European NO<sub>2</sub> standard limit, *Science of The Total*  
587 *Environment*, 646, 1117–1125. <https://doi.org/10.1016/j.scitotenv.2018.07.360>

588 Castelli, M., Clemente, F.M., Popovič, A., Silva, S. & Vanneschi, L. (2020). A  
589 Machine Learning Approach to Predict Air Quality in California, *Complexity*,  
590 vol. 2020, pp. 1–23. <https://doi.org/10.1155/2020/8049504>

591 Cenek, M., Haro, R., Sayers, B., & Peng, J. (2018). Climate change and power  
592 security: Power load prediction for rural electrical microgrids using long short  
593 term memory and artificial neural networks. *Applied Sciences*, 8(5), 749.  
594 <https://doi.org/10.3390/app8050749>

595 Chen, L.-W.A., Chien, L.-C., Li, Y. & Lin, G. (2020). Nonuniform impacts of  
596 COVID-19 lockdown on air quality over the United States, *Science of The*  
597 *Total Environment*, 745, 141105.  
598 <https://doi.org/10.1016/j.scitotenv.2020.141105>

599 Childs, C. (2004). Interpolating surfaces in ArcGIS spatial analyst. *ArcUser*,  
600 July-September, 3235(569), 32–35.

601 Copernicus. (2022). Climate Data Store. Retrieved from  
602 <https://cds.climate.copernicus.eu/>. Accessed August 30, 2022,

- 603 Esri. (2022). Emerging Hot Spot Analysis (Space Time Pattern Mining). Retrieved  
604 from  
605 [https://pro.arcgis.com/en/pro-app/2.8/tool-reference/space-time-pattern-minin](https://pro.arcgis.com/en/pro-app/2.8/tool-reference/space-time-pattern-mining/emerginghotspots.htm)  
606 [g/emerginghotspots.htm](https://pro.arcgis.com/en/pro-app/2.8/tool-reference/space-time-pattern-mining/emerginghotspots.htm). Accessed April 30, 2022
- 607 European Environmental Agency. (2019). Emissions of the main air pollutants by  
608 sector group in the EEA-33. Retrieved from:  
609 <https://www.eea.europa.eu/data-and-maps/daviz/share-of-eea-33-emissions-4>.  
610 Accessed April 23, 2022
- 611 Faridi, S., Yousefian, F., Janjani, H., Niazi, S., Azimi, F., Naddafi, K., & Hassanvand,  
612 M. S. (2021). The effect of COVID-19 pandemic on human mobility and  
613 ambient air quality around the world: A systematic review. *Urban Climate*, 38,  
614 100888. <https://doi.org/10.1016/j.uclim.2021.100888>
- 615 General Mills. (2014). Retrieved from: <https://github.com/GeneralMills/pytrends>.  
616 Accessed August 30, 2022
- 617 Ghahremanloo, M., Lops, Y., Choi, Y., & Mousavinezhad, S. (2021). Impact of the  
618 COVID-19 outbreak on air pollution levels in East Asia. *Science of The Total*  
619 *Environment*, 754, 142226. <https://doi.org/10.1016/j.scitotenv.2020.142226>
- 620 Google. (2022). Google Trends. Retrieved from <https://trends.google.com/>. Accessed  
621 April 30, 2022
- 622 Hale, T., Angrist, N., Goldszmidt, R., Kira, B., Petherick, A., Phillips, T., Webster, S.,  
623 Cameron-Blake, E., Hallas, L., Majumdar, S. & Tatlow, H. (2021). A global  
624 panel database of pandemic policies (Oxford COVID-19 Government  
625 Response Tracker). *Nature Human Behaviour*, vol. 5, pp. 1–10.  
626 <https://doi.org/10.1038/s41562-021-01079-8>

- 627 Hassoun, Y., James, C. & Bernstein, D.I. (2019). The Effects of Air Pollution on the  
628 Development of Atopic Disease. *Clinical Reviews in Allergy & Immunology*,  
629 57, 403–414. <https://doi-org/10.1007/s12016-019-08730-3>
- 630 Heroy, S., Loaiza, I., Pentland, A. & O’Clery, N. (2021). COVID-19 policy analysis:  
631 labour structure dictates lockdown mobility behaviour. *Journal of The Royal*  
632 *Society Interface, Royal Society*, 18, 20201035.  
633 <https://doi.org/10.1098/rsif.2020.1035>
- 634 He, J., Gong, S., Yu, Y., Yu, L., Wu, L., Mao, H., Song, C., Zhao, S., Liu, H., Li, X.,  
635 & Li, R. (2017). Air pollution characteristics and their relation to  
636 meteorological conditions during 2014–2015 in major Chinese cities.  
637 *Environmental Pollution*, 223, 484–496.  
638 <https://doi.org/10.1016/j.envpol.2017.01.050>
- 639 He, J., Yu, Y., Xie, Y., Mao, H., Wu, L., Liu, N., & Zhao, S. (2016). Numerical  
640 Model-Based Artificial Neural Network Model and Its Application for  
641 Quantifying Impact Factors of Urban Air Quality. *Water, Air, & Soil Pollution*,  
642 227(7), 235. <https://doi.org/10.1007/s11270-016-2930-z>
- 643 Hicks, R. (2021). The haze is likely to hit Southeast Asia early in 2021 - is climate  
644 change to blame?. *Eco-Business*. Retrieved from:  
645 <https://www.eco-business.com/news/the-haze-is-likely-to-hit-southeast-asia-early-in-2021-is-climate-change-to-blame/>. Accessed April 20, 2022.
- 647 Jiang, N., Dirks, K. N., & Luo, K. (2014). Effects of local, synoptic and large-scale  
648 climate conditions on daily nitrogen dioxide concentrations in Auckland, New  
649 Zealand. *International Journal of Climatology*, 34(6), 1883–1897.  
650 <https://doi.org/10.1002/joc.3808>

- 651 Kanniah, K. D., Kamarul Zaman, N. A. F., Kaskaoutis, D. G., & Latif, M. T. (2020).  
652 COVID-19's impact on the atmospheric environment in the Southeast Asia  
653 region. *Science of The Total Environment*, 736, 139658.  
654 <https://doi.org/10.1016/j.scitotenv.2020.139658>
- 655 Kumar, P., Hama, S., Omidvarborna, H., Sharma, A., Sahani, J., Abhijith, K. V.,  
656 Debele, S. E., Zavala-Reyes, J. C., Barwise, Y., & Tiwari, A. (2020).  
657 Temporary reduction in fine particulate matter due to 'anthropogenic  
658 emissions switch-off' during COVID-19 lockdown in Indian cities.  
659 *Sustainable Cities and Society*, 62, 102382.  
660 <https://doi.org/10.1016/j.scs.2020.102382>
- 661 Lai, S., Ruktanonchai, N. W., Zhou, L., Prosper, O., Luo, W., Floyd, J. R.,  
662 Wesolowski, A., Santillana, M., Zhang, C., Du, X., Yu, H., & Tatem, A. J.  
663 (2020). Effect of non-pharmaceutical interventions to contain COVID-19 in  
664 China. *Nature*, 585(7825), 410–413.  
665 <https://doi.org/10.1038/s41586-020-2293-x>
- 666 Latif, M. T., Dominick, D., Hawari, N. S. S. L., Mohtar, A. A. A., & Othman, M.  
667 (2021). The concentration of major air pollutants during the movement control  
668 order due to the COVID-19 pandemic in the Klang Valley, Malaysia.  
669 *Sustainable Cities and Society*, 66, 102660.  
670 <https://doi.org/10.1016/j.scs.2020.102660>
- 671 Latza, U., Gerdes, S. & Baur, X. (2009). Effects of nitrogen dioxide on human health:  
672 Systematic review of experimental and epidemiological studies conducted  
673 between 2002 and 2006. *International Journal of Hygiene and Environmental*  
674 *Health*, 212, 271–287. <https://doi.org/10.1016/j.ijheh.2008.06.003>
- 675 Li, J. and Tartarini, F., (2020). Changes in Air Quality during the COVID-19  
676 Lockdown in Singapore and Associations with Human Mobility Trends.

677 Aerosol and Air Quality Research, 20(8), pp.1748-1758.  
678 <https://doi.org/10.4209/aaqr.2020.06.0303>

679 Li, Y., Zhu, Y., Tan, J.Y.K., Teo, H.C., Law, A., Qu, D. and Luo, W., (2022). The  
680 impact of COVID-19 on NO<sub>2</sub> and PM<sub>2.5</sub> levels and their associations with  
681 human mobility patterns in Singapore. *Annals of GIS*, pp.1-17.  
682 <https://doi.org/10.1080/19475683.2022.2121855>

683 Li, Z. (2022). Extracting spatial effects from machine learning model using local  
684 interpretation method: An example of SHAP and XGBoost. *Computers,  
685 Environment and Urban Systems*, 96, 101845.  
686 <https://doi.org/10.1016/j.compenvurbsys.2022.101845>

687 Liu, F., Wang, M. & Zheng, M. (2021). Effects of COVID-19 lockdown on global air  
688 quality and health. *Science of The Total Environment*, vol. 755, p. 142533.  
689 <https://doi.org/10.1016/j.scitotenv.2020.142533>

690 Lundberg, S. M., & Lee, S. I. (2017). A unified approach to interpreting model  
691 predictions. *Advances in neural information processing  
692 systems*, pp. 4765-4774

693 Luo, W., Liu, Z., Zhou, Y., Zhao, Y., Li, Y. E., Masrur, A., & Yu, M. (2022).  
694 Investigating Linkages Between Spatiotemporal Patterns of the COVID-19  
695 Delta Variant and Public Health Interventions in Southeast Asia: Prospective  
696 Space-Time Scan Statistical Analysis Method. *JMIR Public Health and  
697 Surveillance*, 8(8), e35840. <https://doi.org/10.2196/35840>

698 Ma, Y., Zhao, Y., Liu, J., He, X., Wang, B., Fu, S., Yan, J., Niu, J., Zhou, J., Luo, B.,  
699 (2020). Effects of temperature variation and humidity on the death of  
700 COVID-19 in Wuhan, China. *Science of Total Environment*. 724, 138226.  
701 <https://doi.org/10.1016/j.scitotenv.2020.138226>



702 Maas, P. (2019). Facebook Disaster Maps: Aggregate Insights for Crisis Response &  
703 Recovery. The 25th ACM SIGKDD Conference on Knowledge Discovery and  
704 Data Mining, 3173–3173.

705 Mo, C., D. Tan, T. Mai, C. Bei, J. Qin, W. Pang, and Z. Zhang. (2020). An Analysis  
706 of Spatiotemporal Pattern for COIVD-19 in China Based on Space-time Cube.  
707 Journal of Medical Virology 92: 1587–1595.  
708 <https://doi-org/10.1002/jmv.25834>

709 Nakada, L.Y.K. & Urban, R.C. (2020). COVID-19 pandemic: Impacts on the air  
710 quality during the partial lockdown in São Paulo state, Brazil. Science of The  
711 Total Environment, 730, 139087.

712 Nyhan, M.M., Kloog, I., Britter, R., Ratti, C. & Koutrakis, P. (2018), Quantifying  
713 population exposure to air pollution using individual mobility patterns inferred  
714 from mobile phone data. Journal of Exposure Science & Environmental  
715 Epidemiology, vol. 29, no. 2, pp. 238–247.  
716 <https://doi.org/10.1038/s41370-018-0038-9>

717 Rahman, N.H.A., Lee, M.H., Suhartono, & Latif, M.T. (2016). Evaluation  
718 performance of time series approach for forecasting air pollution index in  
719 Johor, Malaysia. Sains Malays 45(11): 1625-1633.

720 Pan, X., Zhao, Y. & Wang, M. (2021). Impact of COVID-19 on Extremely Polluted  
721 Air Quality and Trend Forecast in Seven Provinces and Three Cities of China.  
722 Frontiers in Environmental Science, vol. 9.  
723 <https://doi.org/10.3389/fenvs.2021.7709>

724 Park, Y.M. & Kwan, M.-P. (2017). Individual exposure estimates may be erroneous  
725 when spatiotemporal variability of air pollution and human mobility are

726 ignored. Health & Place, vol. 43, pp. 85–94.  
727 <https://doi.org/10.1016/j.healthplace.2016.10.002>

728 Pearce, J. L., Beringer, J., Nicholls, N., Hyndman, R. J., Uotila, P., & Tapper, N. J.  
729 (2011). Investigating the influence of synoptic-scale meteorology on air  
730 quality using self-organizing maps and generalized additive modelling.  
731 Atmospheric Environment, 45(1), 128–136.  
732 <https://doi.org/10.1016/j.atmosenv.2010.09.032>

733 Piccoli, A., Agresti, V., Balzarini, A., Bedogni, M., Bonanno, R., Collino, E., Colzi,  
734 F., Lacavalla, M., Lanzani, G., Pirovano, G., Riva, F., Riva, G.M. & Toppetti,  
735 A.M. (2020). Modeling the Effect of COVID-19 Lockdown on Mobility and  
736 NO<sub>2</sub> Concentration in the Lombardy Region, Atmosphere, Multidisciplinary  
737 Digital Publishing Institute, 11, 1319. <https://doi.org/10.3390/atmos11121319>

738 Purwanto, P., Utaya, S., Handoyo, B., Bachri, S., Astuti, I.S., Utomo, K.S.B. &  
739 Aldianto, Y.E. (2021). Spatiotemporal Analysis of COVID-19 Spread with  
740 Emerging Hotspot Analysis and Space–Time Cube Models in East Java,  
741 Indonesia. ISPRS International Journal of Geo-Information, vol. 10, no. 3, p.  
742 133. <https://doi.org/10.3390/ijgi10030133>

743 Qin, D., Yu, J., Zou, G., Yong, R., Zhao, Q. & Zhang, B. (2019) A Novel Combined  
744 Prediction Scheme Based on CNN and LSTM for Urban PM<sub>2.5</sub> Concentration.  
745 IEEE Access, vol. 7, pp. 20050–20059.  
746 <https://doi.org/10.1109/ACCESS.2019.2897028>

747 Roberts-Semple, D., Song, F. & Gao, Y. (2012) Seasonal characteristics of ambient  
748 nitrogen oxides and ground–level ozone in metropolitan northeastern New  
749 Jersey. Atmospheric Pollution Research, 3, pp. 247–257.  
750 <https://doi.org/10.5094/APR.2012.027>

- 751 Roy, S., Saha, M., Dhar, B., Pandit, S. & Nasrin, R. (2020), Geospatial analysis of  
752 COVID-19 lockdown effects on air quality in the South and Southeast Asian  
753 region, *Science of The Total Environment*, p. 144009.  
754 <https://doi.org/10.1016/j.scitotenv.2020.144009>
- 755 Ritchie, H., Mathieu, E., Rodés-Guirao, L., Appel, C., Giattino, C., Ortiz-Ospina, E.,  
756 Hasell, J., Macdonald, B., Beltekian, D., and Roser, M. (2020). Coronavirus  
757 Pandemic (COVID-19). Retrieved from  
758 <https://ourworldindata.org/coronavirus>. Accessed April 20, 2022
- 759 Saadat, S., Rawtani, D., Hussain, C.M. (2020). Environmental perspective of  
760 COVID-19. *Science of Total Environment*. 728, pp.138870.  
761 <https://doi.org/10.1016/j.scitotenv.2020.138870>.
- 762 Schwartz, J. (2018). Bing Maps Tile System. Retrieved from  
763 <https://docs.microsoft.com/en-us/bingmaps/articles/bing-maps-tile-system>.  
764 Accessed April 20, 2022
- 765 Shad, R., Mesgari, M. S., abkar, A., & Shad, A. (2009). Predicting air pollution using  
766 fuzzy genetic linear membership kriging in GIS. *Computers, Environment and*  
767 *Urban Systems*, 33(6), 472–481.  
768 <https://doi.org/10.1016/j.compenvurbsys.2009.10.004>
- 769 Shams, S.R., Jahani, A., Kalantary, S., Moeinaddini, M. and Khorasani, N., (2021).  
770 Artificial intelligence accuracy assessment in NO<sub>2</sub> concentration forecasting  
771 of metropolises air. *Scientific Reports*, 11(1), pp.1-9. [https://doi.org](https://doi.org/10.1038/s41598-021-81455-6)  
772 [/10.1038/s41598-021-81455-6](https://doi.org/10.1038/s41598-021-81455-6)
- 773 Shapley, L.S., (1953). Quota solutions op n-person games<sup>1</sup>. Edited by Emil Artin and  
774 Marston Morse, pp.343.

- 775 Sicard, P., De Marco, A., Agathokleous, E., Feng, Z., Xu, X., Paoletti, E., Rodriguez,  
776 J.J.D. & Calatayud, V. (2020). Amplified ozone pollution in cities during the  
777 COVID-19 lockdown. *Science of The Total Environment*, 735, 139542.  
778 <https://doi.org/10.1016/j.scitotenv.2020.139542>
- 779 Syetiawan, A., Harimurti, M., & Prihanto, Y., (2022). A spatiotemporal analysis of  
780 COVID-19 transmission in Jakarta, Indonesia for pandemic decision support,  
781 *Geospatial Health*, vol. 17, no. S1. <https://doi.org/10.4081/gh.2022.1042>
- 782 Tunlathorntham, S., & Thepanondh, S. (2017). Prediction of Ambient Nitrogen  
783 Dioxide Concentrations in the Vicinity of Industrial Complex Area, Thailand.  
784 *Air, Soil and Water Research*, vol. 10, p. 117862211770090.  
785 <https://doi.org/10.1177/1178622117700906>
- 786 Tadano, Y.S., Potgieter-Vermaak, S., Kachba, Y.R., Chiroli, D.M.G., Casacio, L.,  
787 Santos-Silva, J.C., Moreira, C.A.B., Machado, V., Alves, T.A., Siqueira, H. &  
788 Godoi, R.H.M. (2021). Dynamic model to predict the association between air  
789 quality, COVID-19 cases, and level of lockdown, *Environmental Pollution*,  
790 vol. 268, no. Pt B, p. 115920. <https://doi.org/10.1016/j.envpol.2020.115920>
- 791 Tian, Y., Yao, X. & Chen, L. (2019). Analysis of spatial and seasonal distributions of  
792 air pollutants by incorporating urban morphological characteristics,  
793 *Computers, Environment and Urban Systems*, 75, 35–48.  
794 <https://doi.org/10.1016/j.compenvurbsys.2019.01.003>
- 795 Tiwari, A., Gupta, R., & Chandra, R. (2021). Delhi air quality prediction using LSTM  
796 deep learning models with a focus on COVID-19 lockdown. *ArXiv*,  
797 [abs/2102.10551](https://doi.org/10.48550/arXiv.2102.10551). <https://doi.org/10.48550/arXiv.2102.10551>
- 798 Tobías, A., Carnerero, C., Reche, C., Massagué, J., Via, M., Minguillón, M. C.,  
799 Alastuey, A., & Querol, X. (2020). Changes in air quality during the lockdown

800 in Barcelona (Spain) one month into the SARS-CoV-2 epidemic. *Science of*  
801 *The Total Environment*, 726, 138540.  
802 <https://doi.org/10.1016/j.scitotenv.2020.138540>

803 Tonion, F. and Pirotti, F. (2022). SENTINEL-5P NO2 DATA:  
804 CROSS-VALIDATION AND COMPARISON WITH GROUND  
805 MEASUREMENTS. *The International Archives of Photogrammetry, Remote*  
806 *Sensing and Spatial Information Sciences*, 43, pp.749-756.

807 Wackernagel, H. (2003). Ordinary kriging. *Multivariate Geostatistics*, Springer,  
808 Berlin, Heidelberg. pp. 79-88.

809 Wang, A., Xu, J., Tu, R., Saleh, M. & Hatzopoulou, M. (2020). Potential of machine  
810 learning for prediction of traffic related air pollution. *Transportation Research*  
811 *Part D: Transport and Environment*, vol. 88, p. 102599.  
812 <https://doi.org/10.1016/j.trd.2020.102599>

813 Wang, Y., Fu, X., Jiang, W., Wang, T., Tsou, M.-H., & Ye, X. (2017). Inferring urban  
814 air quality based on social media. *Computers, Environment and Urban*  
815 *Systems*, 66, 110–116. <https://doi.org/10.1016/j.compenvurbsys.2017.07.002>

816 World Health Organization 2022, WHO Coronavirus (COVID-19) Dashboard.  
817 Retrieved from [covid19.who.int](https://covid19.who.int). Accessed March 10, 2022.

818 Wihayati & Wibowo, F.W. (2021). Prediction of air quality in Jakarta during the  
819 COVID-19 outbreak using long short-term memory machine learning. *IOP*  
820 *Conference Series: Earth and Environmental Science*, vol. 704, no. 1, p.  
821 012046.

822 Wu, Y. & Song, G. (2019). The Impact of Activity-Based Mobility Pattern on  
823 Assessing Fine-Grained Traffic-Induced Air Pollution Exposure. *International*

- 824 Journal of Environmental Research and Public Health, vol. 16, no. 18, p. 3291.  
825 <https://doi.org/10.3390/ijerph16183291>
- 826 Wu, C., He, H., Song, R. & Peng, Z. (2022). Prediction of air pollutants on roadside  
827 of the elevated roads with combination of pollutants periodicity and deep  
828 learning method, *Building and Environment*, vol. 207, p. 108436.  
829 <https://doi.org/10.1016/j.buildenv.2021.108436>
- 830 Wyche, K. P., Nichols, M., Parfitt, H., Beckett, P., Gregg, D. J., Smallbone, K. L., &  
831 Monks, P. S. (2021). Changes in ambient air quality and atmospheric  
832 composition and reactivity in the South East of the UK as a result of the  
833 COVID-19 lockdown. *Science of The Total Environment*, 755, 142526.  
834 <https://doi.org/10.1016/j.scitotenv.2020.142526>
- 835 Yang, J., Wen, Y., Wang, Y., Zhang, S., Pinto, J.P., Pennington, E.A., Wang, Z., Wu,  
836 Y., Sander, S.P., Jiang, J.H., Hao, J., Yung, Y.L. & Seinfeld, J.H. (2021).  
837 From COVID-19 to future electrification: Assessing traffic impacts on air  
838 quality by a machine-learning model, *Proceedings of the National Academy of*  
839 *Sciences*, vol. 118, no. 26. <https://doi.org/10.1073/pnas.2102705118>
- 840 Zangari, S., Hill, D. T., Charette, A. T., & Mirowsky, J. E. (2020). Air quality  
841 changes in New York City during the COVID-19 pandemic. *Science of The*  
842 *Total Environment*, 742, 140496.  
843 <https://doi.org/10.1016/j.scitotenv.2020.140496>
- 844 Zhu, R., Anselin, L., Batty, M., Kwan, M.-P., Chen, M., Luo, W., Cheng, T., Lim, C.  
845 K., Santi, P., Cheng, C., Gu, Q., Wong, M. S., Zhang, K., Lü, G., & Ratti, C.  
846 (2022). The effects of different travel modes and travel destinations on  
847 COVID-19 transmission in global cities. *Science Bulletin*, 67(6), 588–592.  
848 <https://doi.org/10.1016/j.scib.2021.11.023>

849 Zhu, Y., Mao, L., and Zhang., X. (2020). Air Pollution and Mobility in Singapore  
850 during COVID - 19 Pandemic, Technical Working Paper #04-2020, Asia  
851 Competitiveness Institute Technical Working Paper Series.

852 **Appendix**

853 Appendix A: Distribution and Temporal Variation of Facebook movement and NO<sub>2</sub> in Indonesia, between Apr 2020 and Feb 2022.

854

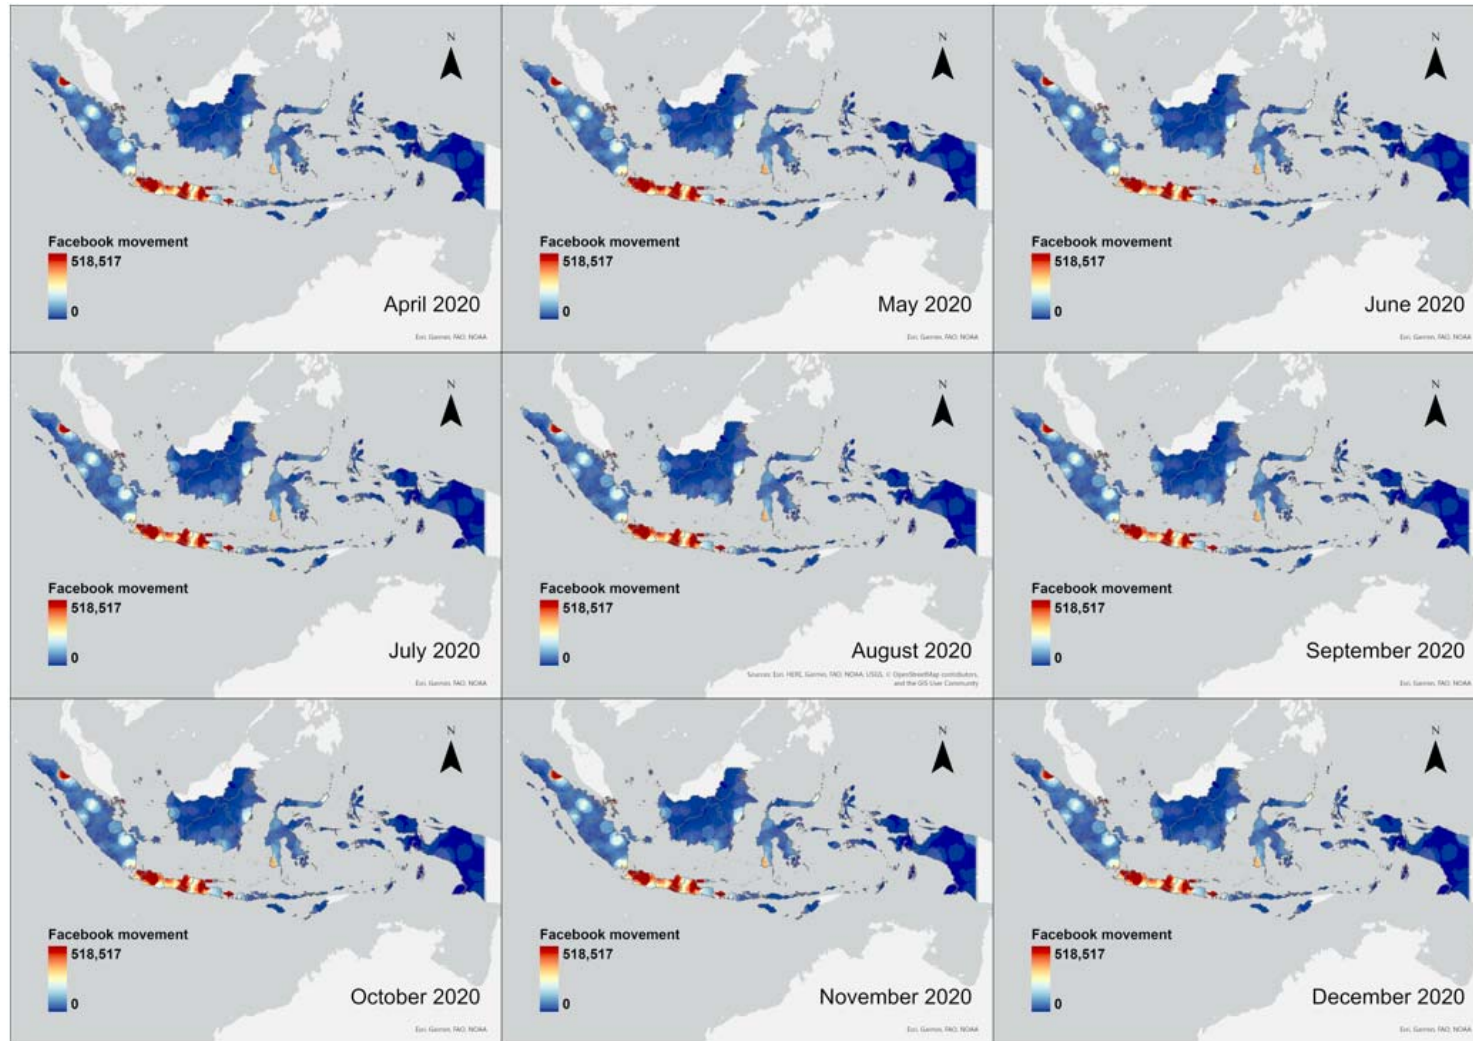



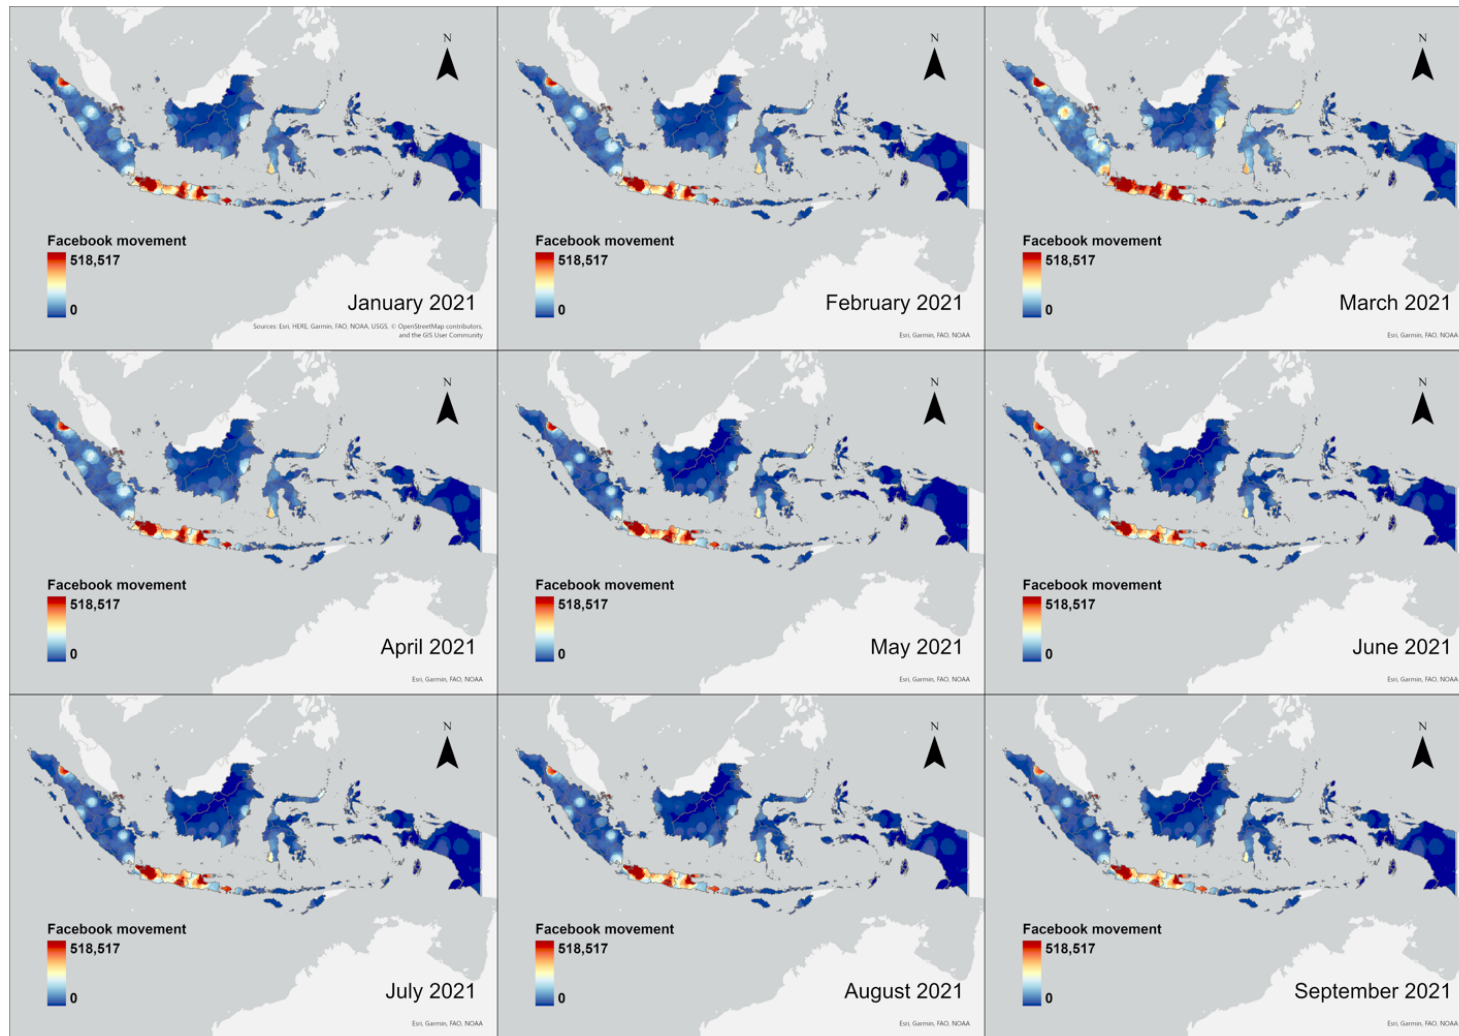

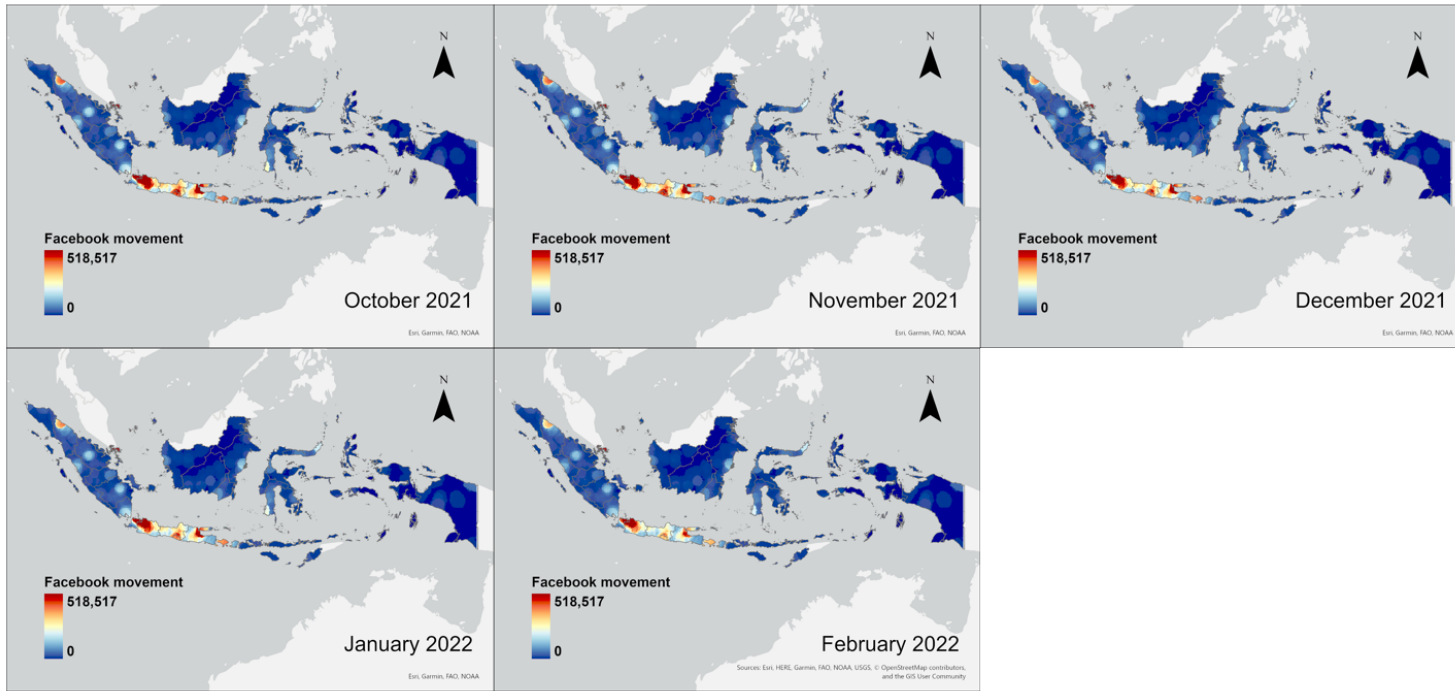

856

857

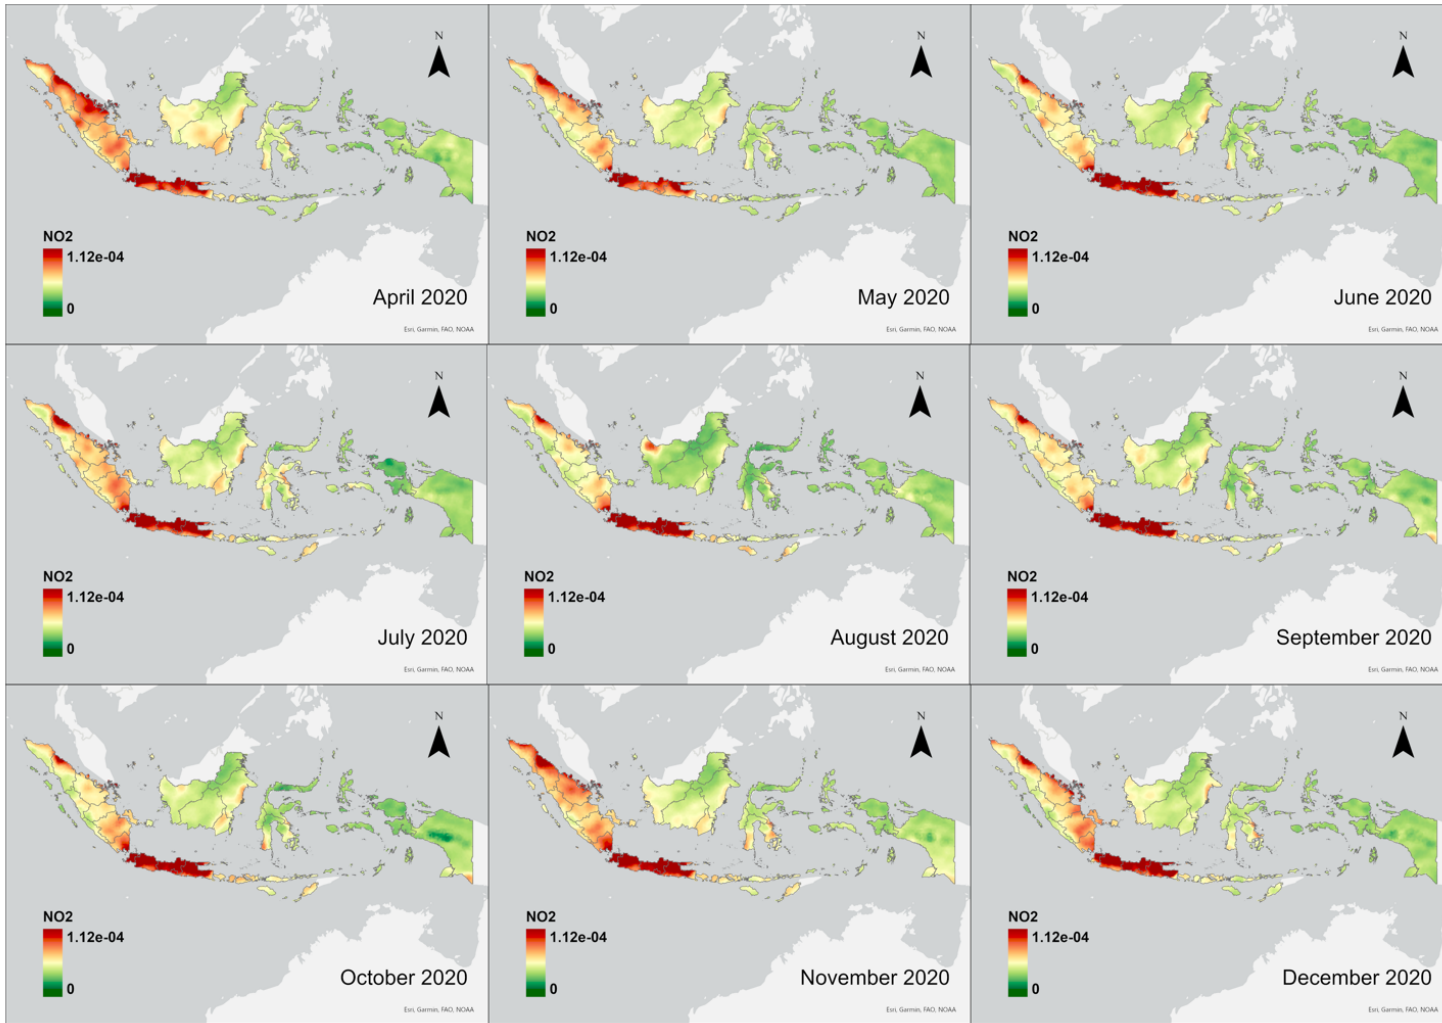

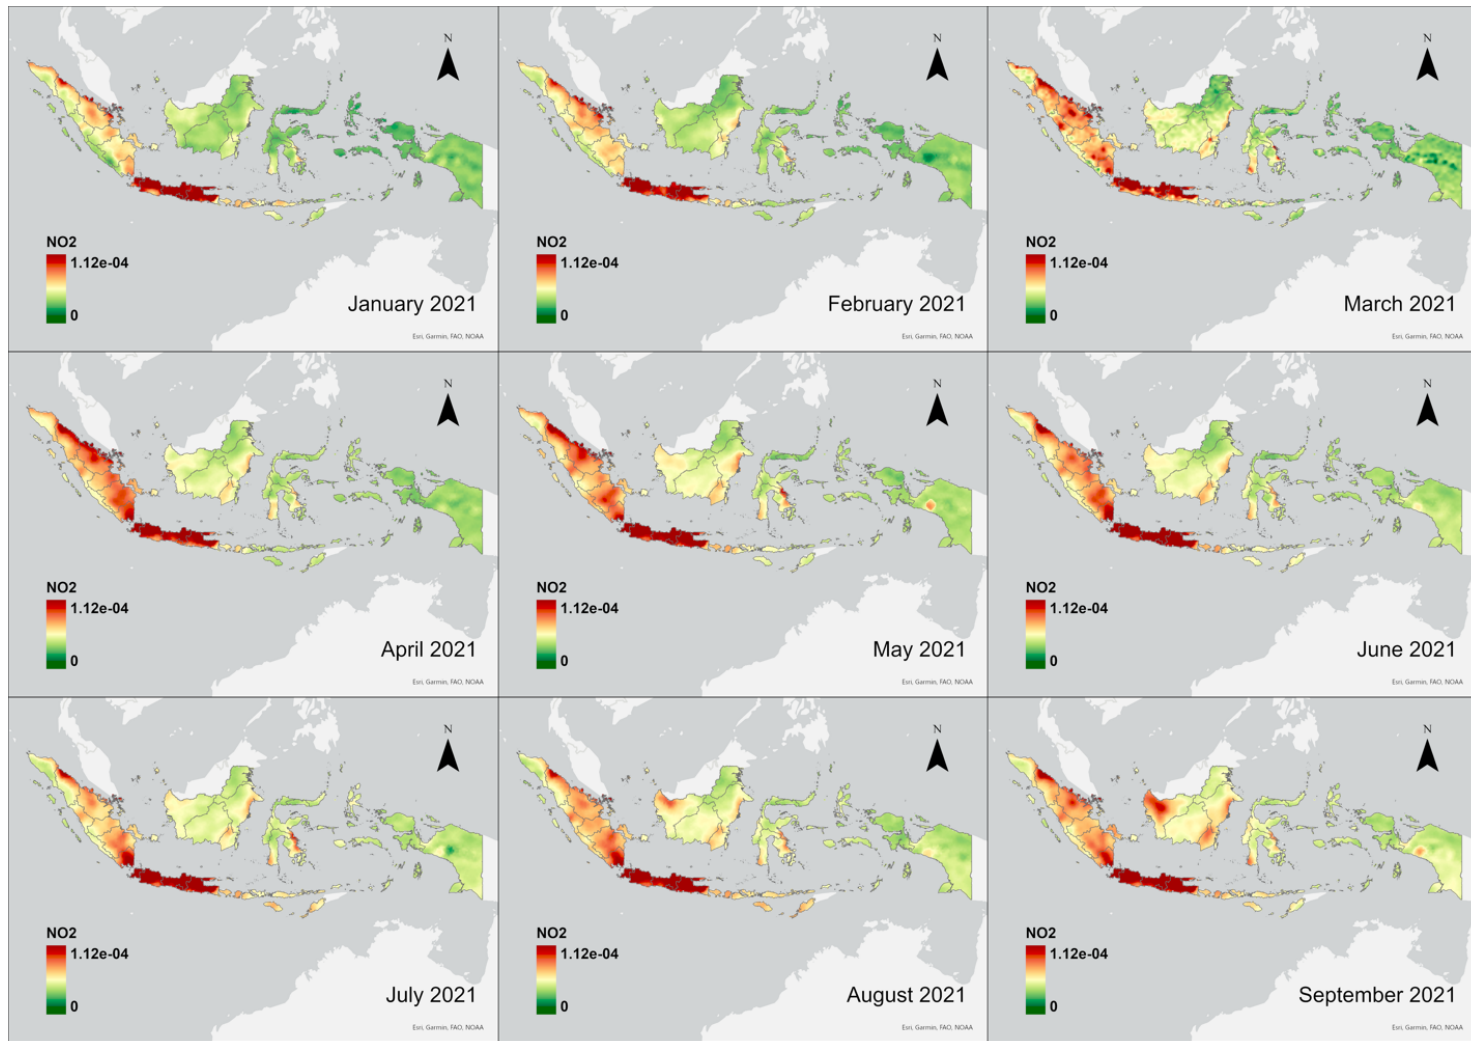

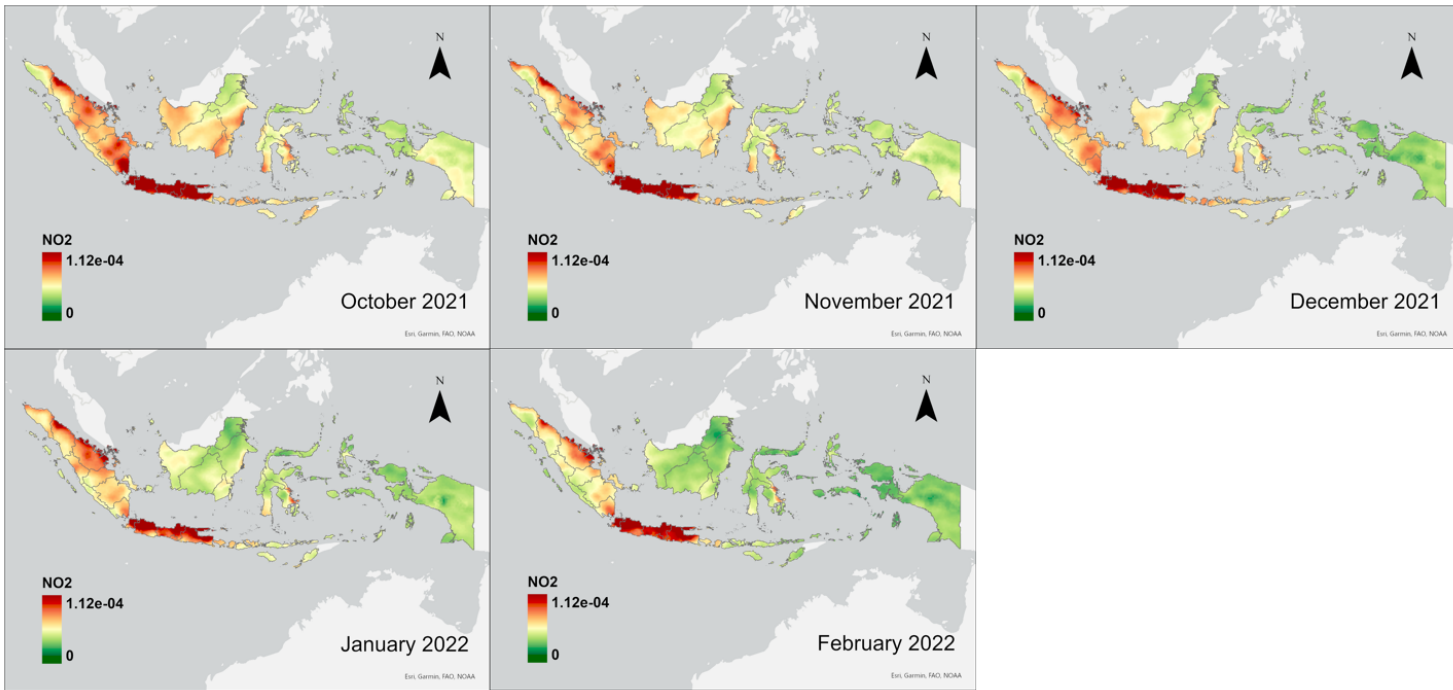

Source: https://medrxiv.org/content/10.1101/2022.10.29.22281700v1.full.pdf
